# Supplementary material for: Organic ligand and solvent free oxidative carbonylation of amine over Pd/TiO2 with unprecedented activity
Source: Royal Society of Chemistry journal article supplement (doi:10.1039/c9gc01577a), 2019-01-01
Supplement: c9gc01577a1.pdf [file c9gc01577a1.pdf]

# Organic ligand and solvent free oxidative carbonylation of amine over Pd/TiO<sub>2</sub> with unprecedented activity

Shujuan Liu,<sup>[a,b]</sup> Xingchao Dai,<sup>[a,b]</sup> Hongli Wang,<sup>[a]</sup> and Feng Shi<sup>[a]\*</sup>

*<sup>a</sup>State Key Laboratory for Oxo Synthesis and Selective Oxidation, Lanzhou Institute of Chemical Physics, Chinese Academy of Sciences, No.18, Tianshui Middle Road, Lanzhou, 730000, China;*

E-mail: [fshi@licp.cas.cn](mailto:fshi@licp.cas.cn)

*<sup>b</sup>University of Chinese Academy of Sciences, No. 19A, Yuquanlu, Beijing, 100049, China*

## Table of Contents

|                                                  |     |
|--------------------------------------------------|-----|
| 1. Optimization of the reaction conditions ..... | S2  |
| 2. Characterization results of catalysts .....   | S5  |
| 3. Characterization data for products .....      | S6  |
| 4. NMR spectra of the products .....             | S8  |
| 5. References .....                              | S25 |

## 1. Optimization of the reaction conditions.

Table S1 Reaction condition optimization for oxidative carbonylation of aniline <sup>a</sup>

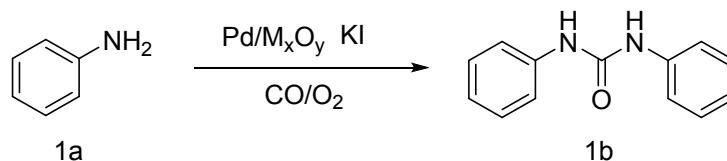

| Entry | Catalyst                          | Metal content (wt%) <sup>b</sup> | Yield /% <sup>b</sup> | TON    | TOF/h <sup>-1</sup> |
|-------|-----------------------------------|----------------------------------|-----------------------|--------|---------------------|
| 1     | Pd/TiO <sub>2</sub>               | 0.004                            | 54                    | 572000 | 72000               |
| 2     | Pd/Al <sub>2</sub> O <sub>3</sub> | 0.002                            | 21                    | 222000 | 37000               |
| 3     | Pd/SiO <sub>2</sub>               | 0.002                            | 35                    | 742000 | 92750               |
| 4     | Pd/Fe <sub>2</sub> O <sub>3</sub> | 0.004                            | 29                    | 154000 | 25667               |

<sup>a</sup> Reaction conditions: 1a (20 mmol), catalyst (50 mg), KI (1 mol %), CO (35 bar), O<sub>2</sub> (5 bar), solvent free, 92 ± 2 °C, 8 h, TON was defined as mol aniline converted per mol Pd and TOF as mol aniline converted per mol Pd per h; <sup>b</sup> Determined by isolated yield.

Table S2. Screening of the [I] for the carbonylation of aniline <sup>a</sup>.

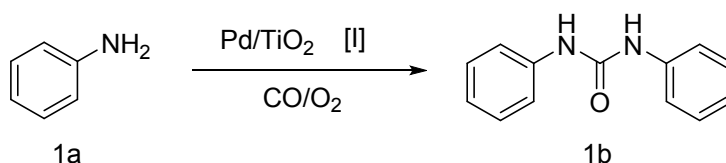

| Entry | [I]                    | Yield /% <sup>b</sup> | TON    | TOF/h <sup>-1</sup> |
|-------|------------------------|-----------------------|--------|---------------------|
| 1     | KI                     | 54                    | 572000 | 72000               |
| 2     | I <sub>2</sub>         | 36                    | 382000 | 48000               |
| 3     | NaI                    | 27                    | 286000 | 36000               |
| 4     | (n-Bu) <sub>4</sub> NI | 11                    | 116000 | 15000               |

<sup>a</sup> Reaction conditions: 1a (20 mmol), catalyst (50 mg), [I] (1 mol %), CO (35 bar), O<sub>2</sub> (5 bar), solvent free, 92 ± 2 °C, 8 h, TON was defined as mol aniline converted per mol Pd and TOF as mol aniline converted per mol Pd per h; <sup>b</sup> Determined by isolated yield.

Table S3. Screening of the amount of KI for the carbonylation of aniline <sup>a</sup>.

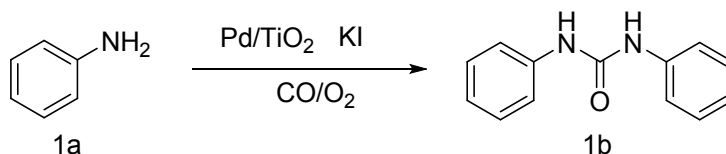

| Entry | [KI]      | Yield /% <sup>b</sup> | TON    | TOF/h <sup>-1</sup> |
|-------|-----------|-----------------------|--------|---------------------|
| 1     | 0.2 mol % | 38                    | 402000 | 50000               |
| 2     | 0.5 mol % | 40                    | 424000 | 53000               |
| 3     | 1 mol %   | 54                    | 572000 | 72000               |

<sup>a</sup> Reaction conditions: 1a (20 mmol), catalyst (50 mg), CO (35 bar), O<sub>2</sub> (5 bar), solvent free, 92 ± 2 °C, 8 h, TON was defined as mol aniline converted per mol Pd and TOF as mol aniline converted per mol Pd per h; <sup>b</sup> Determined by isolated yield.

Table S4. Screening of the pressure of CO and O<sub>2</sub> for the carbonylation of aniline <sup>a</sup>.

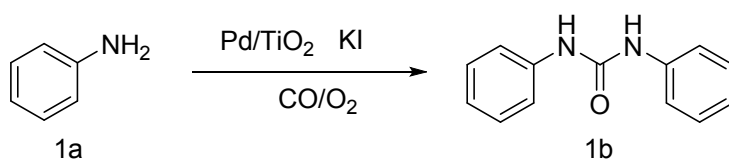

| Entry | CO (bar) | O <sub>2</sub> (bar) | Yield /% <sup>b</sup> | TON    | TOF/h <sup>-1</sup> |
|-------|----------|----------------------|-----------------------|--------|---------------------|
| 1     | 1        | 0.1                  | 28                    | 296000 | 37000               |
| 2     | 2        | 0.1                  | 36                    | 382000 | 48000               |
| 3     | 3        | 0.1                  | 41                    | 434000 | 54000               |
| 4     | 3.5      | 0.1                  | 46                    | 488000 | 61000               |
| 6     | 2.5      | 0.5                  | 39                    | 414000 | 52000               |
| 7     | 3.5      | 0.5                  | 54                    | 572000 | 72000               |

<sup>a</sup> Reaction conditions: 1a (20 mmol), catalyst (50 mg), KI (1 mol %), solvent free, 92 ± 2 °C, 8 h, TON was defined as mol aniline converted per mol Pd and TOF as mol aniline converted per mol Pd per h; <sup>b</sup> Determined by isolated yield.

Table S5. Screening of the temperature for the carbonylation of aniline <sup>a</sup>.

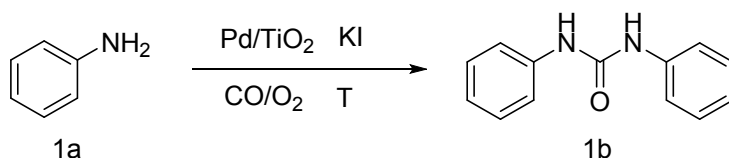

| Entry | T (°C)   | Yield /% <sup>b</sup> | TON    | TOF/h <sup>-1</sup> |
|-------|----------|-----------------------|--------|---------------------|
| 1     | 105(92)  | 10                    | 402000 | 50000               |
| 2     | 120(108) | 54                    | 572000 | 72000               |
| 3     | 135(122) | 55                    | 584000 | 73000               |

<sup>a</sup> Reaction conditions: 1a (20 mmol), catalyst (50 mg), KI (1 mol %), CO (35 bar), O<sub>2</sub> (5 bar), solvent free, 8 h, TON was defined as mol aniline converted per mol Pd and TOF as mol aniline converted per mol Pd per h; <sup>b</sup> Determined by isolated yield.

Table S6. Screening of the solvent for the carbonylation of aniline <sup>a</sup>.

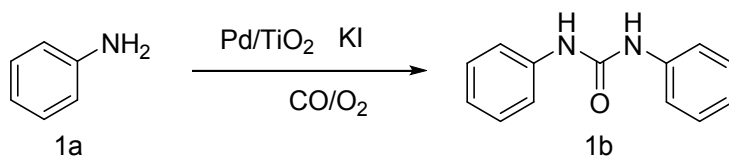

| Entry          | solvent            | Yield /% <sup>b</sup> | TON    | TOF/h <sup>-1</sup> |
|----------------|--------------------|-----------------------|--------|---------------------|
| 1              | --                 | 55                    | 584000 | 73000               |
| 2              | toluene            | 53                    | 564000 | 70000               |
| 3              | NMP                | 50                    | 534000 | 67000               |
| 4              | CH <sub>3</sub> CN | 48                    | 514000 | 64000               |
| 5              | cyclohexane        | 41                    | 430000 | 54000               |
| 6              | dioxane            | 38                    | 400000 | 50000               |
| 7              | DMF                | 12                    | 132000 | 17000               |
| 8 <sup>c</sup> | CH <sub>3</sub> CN | 5                     | 52000  | 7000                |

<sup>a</sup> Reaction conditions: 1a (20 mmol), catalyst (50 mg), KI (1 mol %), CO (35 bar), O<sub>2</sub> (5 bar), solvent (3 mL), 122 ± 2 °C, 8 h, TON was defined as mol aniline converted per mol Pd and TOF as mol aniline converted per mol Pd per h; <sup>b</sup> Determined by isolated yield; <sup>c</sup> CH<sub>3</sub>CN (15 mL).

Table S7. Screening of the time for the carbonylation of aniline <sup>a</sup>.

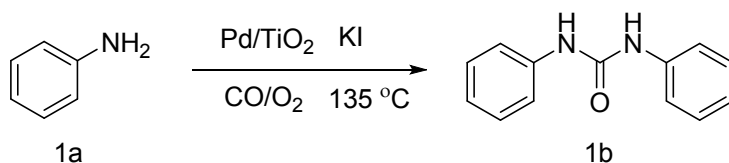

| Entry | Time /h | Yield/% <sup>b</sup> | TON    | TOF/h <sup>-1</sup> |
|-------|---------|----------------------|--------|---------------------|
| 1     | 1       | 24                   | 254000 | 254000              |
| 2     | 2       | 30                   | 322000 | 161000              |
| 3     | 4       | 47                   | 500000 | 125000              |
| 4     | 6       | 54                   | 578000 | 96000               |
| 5     | 8       | 55                   | 584000 | 73000               |
| 6     | 24      | 59                   | 624000 | 26000               |

<sup>a</sup> Reaction conditions: 1a (20 mmol), catalyst (50 mg), KI (1 mol %), CO (35 bar), O<sub>2</sub> (5 bar), solvent free, 122 ± 2 °C; TON was defined as mol aniline converted per mol Pd and TOF as mol aniline converted per mol Pd per h <sup>b</sup> Determined by isolated yield.

## 2. Characterization results of catalysts

Table S8. The physicochemical properties of catalysts.

| Entry | Catalyst            | SA <sup>a</sup><br>(m <sup>2</sup> g <sup>-1</sup> ) | APR <sup>a</sup><br>(nm) | PV <sup>a</sup><br>(cm <sup>3</sup> g <sup>-1</sup> ) |
|-------|---------------------|------------------------------------------------------|--------------------------|-------------------------------------------------------|
| 1     | Pd/TiO <sub>2</sub> | 103.0                                                | 18.8                     | 0.97                                                  |

<sup>a</sup> Determined by an IQ2 automated gas sorption analyser. SA: BET surface area; APS: average pore radius; PV: pore volume.

Table S9. Reuse of the catalyst.

| entry | Time | actual metal loading <sup>b</sup> | Yield/% <sup>c</sup> | TON    | TOF/h <sup>-1</sup> |
|-------|------|-----------------------------------|----------------------|--------|---------------------|
| 1     | 1    | 0.002 wt %                        | 85                   | 450000 | 225000              |
| 2     | 2    | 0.002 wt %                        | 84                   | 444000 | 222000              |
| 3     | 3    | 0.002 wt %                        | 87                   | 460000 | 250000              |

Reaction conditions: benzylamine (5 mmol), 0.004 wt% Pd/TiO<sub>2</sub> (35 mg), CO (35 bar), O<sub>2</sub> (5 bar), KI (1 mol %), toluene (2 mL), 122 ± 2 °C, 2 h. TON was defined as mol aniline converted per mol Pd and TOF as mol aniline converted per mol Pd per h; <sup>b</sup> Determined by ICP-AES; <sup>c</sup> Determined by isolated yield.

**Fig. S1** XRD patterns of prepared catalysts.

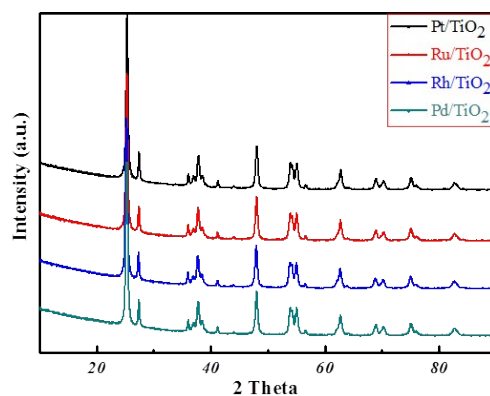

**Fig. S2** TEM patterns of prepared catalysts. 0.274 wt% Pd/TiO<sub>2</sub> catalyst (a, b, c), 0.004 wt% Pd/TiO<sub>2</sub> fresh catalyst (d, e), 0.004 wt% Pd/TiO<sub>2</sub> fresh catalyst used three times (f, g).

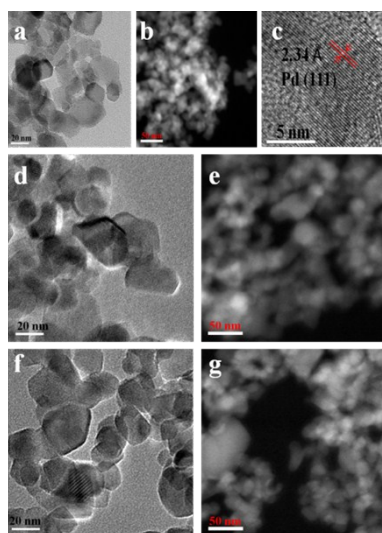

**Fig. S3** BJH Desorption patterns of prepared catalysts

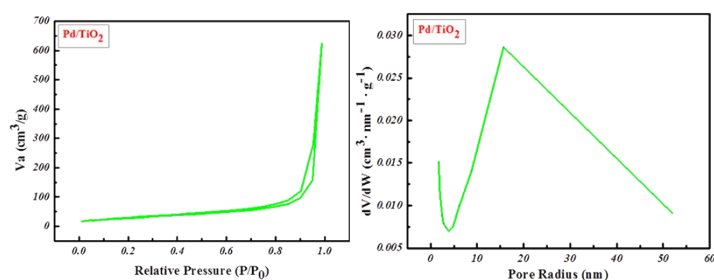

### 3. Characterization data for products

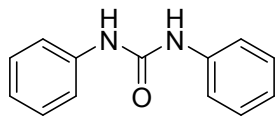

**1b 1,3-diphenylurea**<sup>1</sup>: The title compound was prepared according to the general procedure and purified by heating to remove the reactant to give the desired product which was a white solid; mp: 227-232 °C; <sup>1</sup>H NMR (400 MHz, DMSO-d<sub>6</sub>) δ 8.67 (brs, 2H), 7.41-7.43 (m, 4H), 7.26-7.30 (m, 4H), 6.99-7.03 (m, 2H); <sup>13</sup>C NMR (100 MHz, DMSO-d<sub>6</sub>) δ 148.9, 131.9, 121.3, 115.3, 111.9.

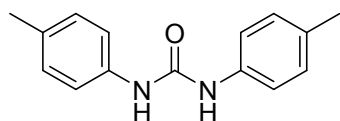

**2b 1,3-Bis(4-methylphenyl)urea**<sup>1</sup>: The title compound was prepared according to the general procedure and purified by heating to remove the reactant to give the desired product which was white solid; mp: 266-267 °C; <sup>1</sup>H NMR (400 MHz, DMSO-d<sub>6</sub>) δ 8.48 (brs, 2H), 7.32 (d, 4.8 MHz, 4H), 7.07 (d, 5.2 MHz, 4H), 2.24 (s, 6H); <sup>13</sup>C NMR (100 MHz, DMSO-d<sub>6</sub>) δ 152.6, 137.2, 130.5, 129.1, 118.2, 20.3.

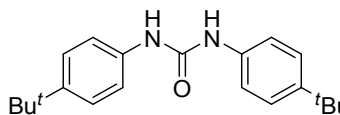

**3b 1,3-bis(4-tert-butylphenyl)urea**<sup>2</sup>: The title compound was prepared according to the general procedure and purified by heating to remove the reactant to give the desired product which was a black sticky oil; <sup>1</sup>H NMR (400 MHz, DMSO-d<sub>6</sub>) δ 8.53 (brs, 2H), 7.35 (d, 8.8 MHz, 4H), 7.28 (d, 8.4 MHz, 4H), 1.25 (s, 18H); <sup>13</sup>C NMR (100 MHz, DMSO-d<sub>6</sub>) δ 146.8, 138.8, 126.2, 118.9, 114.6, 40.0, 32.4.

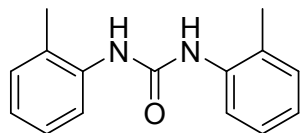

**4b 1,3-dio-tolylurea**<sup>3</sup>: The title compound was prepared according to the general procedure and purified by heating to remove the reactant to give the desired product which was a black sticky oil; <sup>1</sup>H NMR (400 MHz, DMSO-d<sub>6</sub>) δ 8.27 (brs, 2H), 7.80-7.82 (m, 2H), 7.12-7.18 (m, 4H), 6.92-6.96 (m, 2H), 2.26 (s, 6H); <sup>13</sup>C NMR (100 MHz, DMSO-d<sub>6</sub>) δ 147.3, 130.8, 127.3, 121.9, 117.0, 114.9, 18.3.

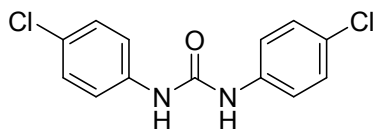

**5b 1,3-Bis(4-chlorophenyl)urea**<sup>1</sup>: The title compound was prepared according to the general procedure and purified by heating to remove the reactant to give the desired product which was a brown solid; mp: 278-280 °C; <sup>1</sup>H NMR (400 MHz, DMSO-d<sub>6</sub>) δ 8.89 (brs, 2H), 7.48 (d, 8.0 MHz, 4H), 7.33 (d, 8.4 MHz, 4H); <sup>13</sup>C NMR (100 MHz, DMSO-d<sub>6</sub>) δ 152.3, 138.5, 128.6, 125.5, 119.8.

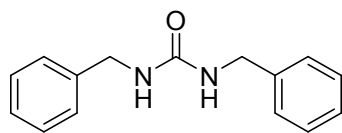

**6b 1,3-Dibenzylurea<sup>1</sup>:** The title compound was prepared according to the general procedure and purified by heating to remove the reactant to give the desired product which was light brown solid; mp: 209-210°C; <sup>1</sup>H NMR (400 MHz, DMSO-d<sub>6</sub>) δ 7.24-7.31 (m, 10H), 6.44 (brs, 2H), 4.23 (s, 4H); <sup>13</sup>C NMR (100 MHz, DMSO-d<sub>6</sub>) δ 158.1, 140.9, 128.2, 127.0, 126.5, 40.0.

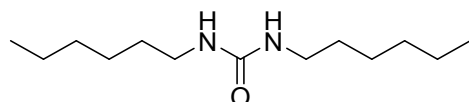

**7b 1,3-dihexylurea<sup>1</sup>:** The title compound was prepared according to the general procedure and purified by heating to remove the reactant to give the desired product which was a brown sticky oil; <sup>1</sup>H NMR (400 MHz, DMSO-d<sub>6</sub>) δ 5.72 (brs, 2H), 3.50 (s, 2H), 2.92-3.11 (m, 3H), 1.24-1.44 (m, 16H), 0.84-0.86 (m, 6H); <sup>13</sup>C NMR (100 MHz, DMSO-d<sub>6</sub>) δ 158.1, 39.2, 31.1, 30.0, 26.1, 22.1, 13.9.

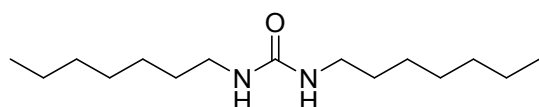

**8b 1,3-diheptylurea<sup>1</sup>:** The title compound was prepared according to the general procedure and purified by heating to remove the reactant to give the desired product which was a yellow sticky solid; mp: 65°C; <sup>1</sup>H NMR (400 MHz, DMSO-d<sub>6</sub>) δ 5.73 (brs, 2H), 2.95-3.11 (m, 4H), 1.24-2.02 (m, 20H), 0.86 (s, 6H); <sup>13</sup>C NMR (100 MHz, CDCl<sub>3</sub>) δ 158.7, 40.5, 31.7, 30.3, 29.0, 26.9, 22.5, 14.0.

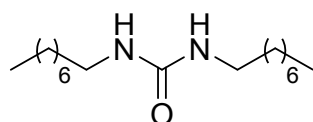

**9b 1,3-dioctylurea<sup>4</sup>:** The title compound was prepared according to the general procedure and purified by heating to remove the reactant to give the desired product which was a yellow sticky solid; <sup>1</sup>H NMR (400 MHz, DMSO-d<sub>6</sub>) δ 8.01 (brs, 2H), 3.03-3.34 (m, 2H), 1.28 (m, 26H), 0.88-0.89 (m, 6H); <sup>13</sup>C NMR (100 MHz, DMSO-d<sub>6</sub>) δ 161.7, 38.0, 32.2, 30.0, 29.6, 27.3, 23.1, 14.9.

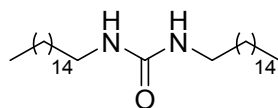

**10b 1,3-dicetylurea:** The title compound was prepared according to the general procedure and purified by heating to remove the reactant to give the desired product which was a yellow solid; <sup>1</sup>H NMR (400 MHz, DMSO-d<sub>6</sub>) δ 1.28 (m, 56H), 0.89 (t, 4.4 MHz, 6H); <sup>13</sup>C NMR (100 MHz, CDCl<sub>3</sub>) δ 156.2, 40.7, 31.9, 29.7, 29.6, 29.4, 22.7, 14.1.

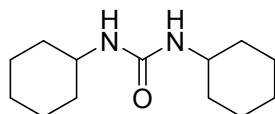

**11b 1,3-dicyclohexylurea<sup>1</sup>:** The title compound was prepared according to the general procedure and purified by heating to remove the reactant to give the desired product which was a light grey

solid; mp: 209-210°C; <sup>1</sup>H NMR (400 MHz, CDCl<sub>3</sub>) δ 3.46-3.41 (m, 2H) 1.10-1.95 (m, 20H); <sup>13</sup>C NMR (100 MHz, CDCl<sub>3</sub>) δ 156.7, 49.1, 33.9, 25.6, 24.9.

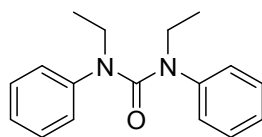

**12b 1,3-diethyl-1,3-diphenylurea:** The title compound was prepared according to the general procedure and purified by heating to remove the reactant to give the desired product which was a black sticky oil; <sup>1</sup>H NMR (400 MHz, DMSO-d<sub>6</sub>) δ 8.45 (brs, 2H), 7.11-7.14 (m, 4H), 6.57-6.63 (m, 4H), 3.05-3.09 (m, 4H), 1.21 (t, 4.6 MHz, 6H); <sup>13</sup>C NMR (100 MHz, DMSO-d<sub>6</sub>) δ 149.9, 149.3, 129.7, 116.3, 112.8, 38.2, 15.3.

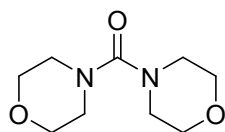

**13b dimorpholinomethanone<sup>1</sup>:** The title compound was prepared according to the general procedure and purified by heating to remove the reactant to give the desired product which was a brown sticky oil; <sup>1</sup>H NMR (400 MHz, DMSO-d<sub>6</sub>) δ 3.13-3.57 (m, 16H); <sup>13</sup>C NMR (100 MHz, DMSO-d<sub>6</sub>) δ 162.6, 66.2, 65.9, 65.7, 46.8, 45.8, 40.6.

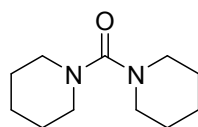

**14b 4,4'-Carbonyldimorpholine<sup>5</sup>:** The title compound was prepared according to the general procedure and purified by heating to remove the reactant to give the desired product which was a brown sticky oil; <sup>1</sup>H NMR (400 MHz, DMSO-d<sub>6</sub>) δ 3.04-3.48 (m, 8H), 1.27-1.63 (m, 12H); <sup>13</sup>C NMR (100 MHz, CDCl<sub>3</sub>) δ 163.2, 46.8, 41.4, 26.1, 25.0, 24.0.

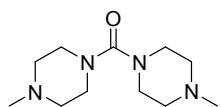

**15b bis(4-methylpiperazin-1-yl)methanone<sup>6</sup>:** The title compound was prepared according to the general procedure and purified by heating to remove the reactant to give the desired product which was a black sticky oil; <sup>1</sup>H NMR (400 MHz, DMSO-d<sub>6</sub>) δ 8.02 (brs, 2H), 3.36-3.39 (m, 8H), 2.17-2.32 (m, 14H); <sup>13</sup>C NMR (100 MHz, DMSO-d<sub>6</sub>) δ 161.6, 56.0, 54.8, 46.6, 45.6, 35.1.

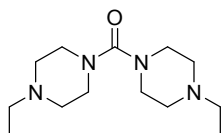

**16b bis(4-ethylpiperazin-1-yl)methanone:** The title compound was prepared according to the general procedure and purified by heating to remove the reactant to give the desired product which was a black sticky oil; <sup>1</sup>H NMR (400 MHz, DMSO-d<sub>6</sub>) δ 8.02 (brs, 2H), 3.37-3.40 (m, 8H), 2.30-2.36 (m, 12H), 1.00-1.02 (m, 6H); <sup>13</sup>C NMR (100 MHz, DMSO-d<sub>6</sub>) δ 161.4, 53.8, 52.6, 52.5, 45.7, 12.7.

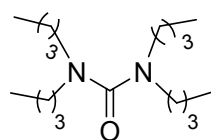

**17b 1,1,3,3-tetraethylurea<sup>7</sup>:** The title compound was prepared according to the general procedure and purified by heating to remove the reactant to give the desired product which was a black sticky oil;



$^1\text{H}$  NMR (400 MHz, DMSO- $d_6$ )  $\delta$  3.22-3.23 (m, 2H), 1.44-1.49 (m, 4H), 1.25-1.28 (m, 4H), 0.89-0.92 (m, 6H);  
 $^{13}\text{C}$  NMR (100 MHz, DMSO- $d_6$ )  $\delta$  163.2, 46.9, 29.8, 20.4, 14.4.

#### 4. NMR spectra of the products

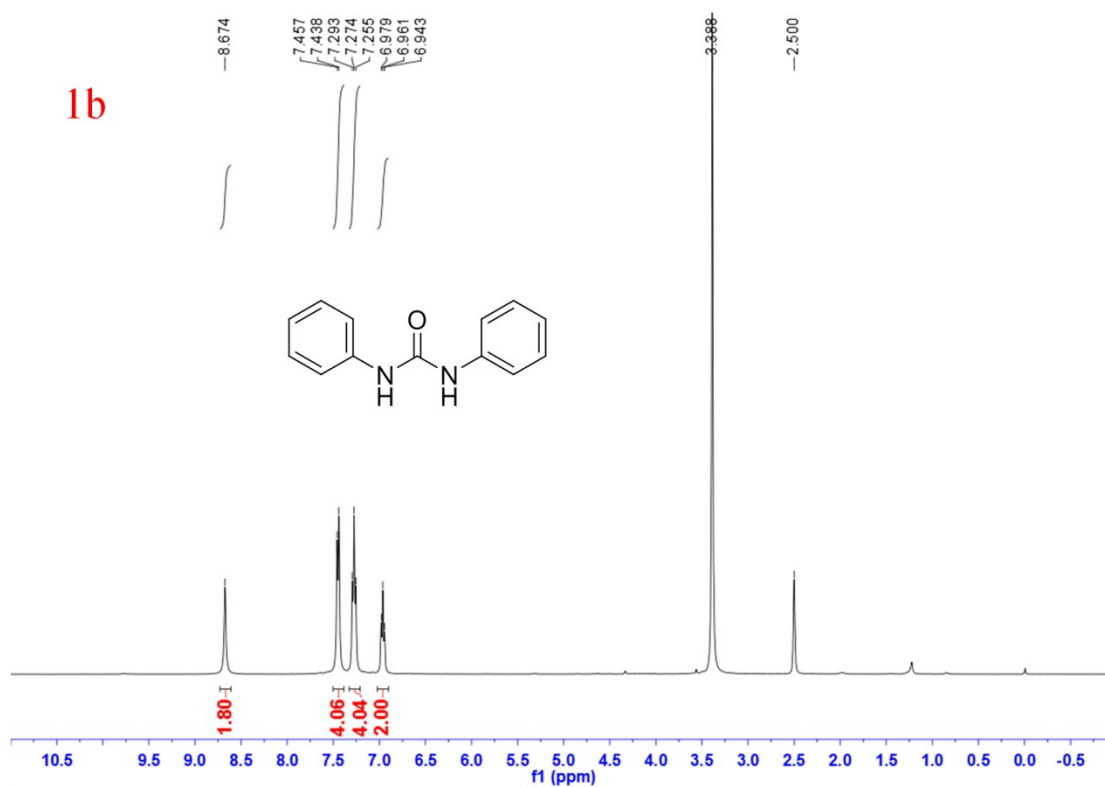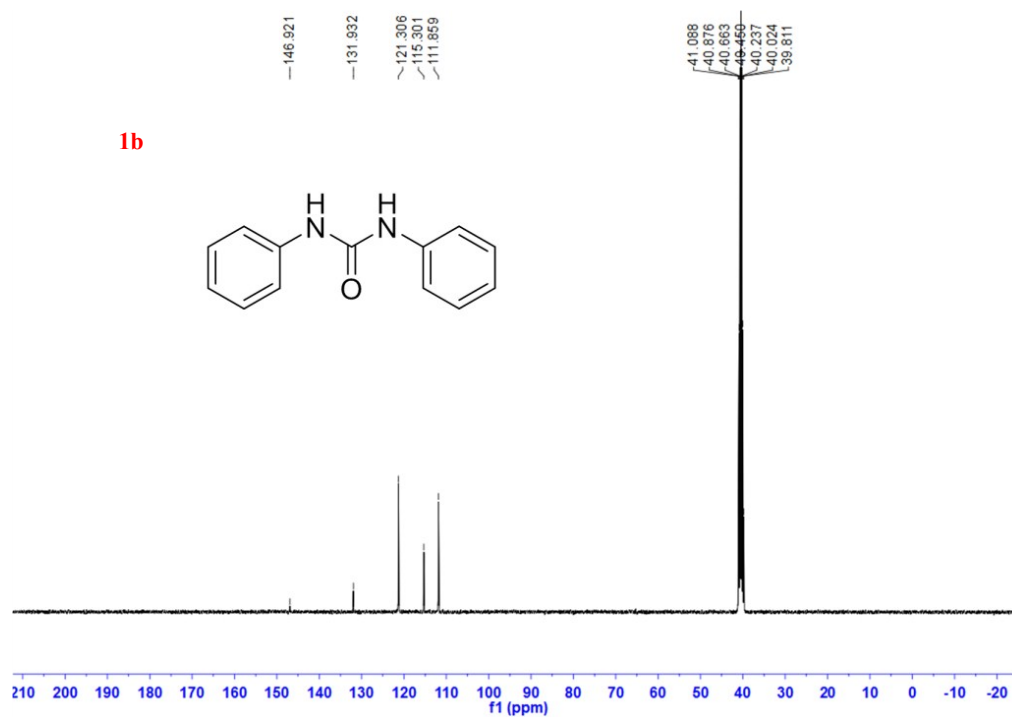

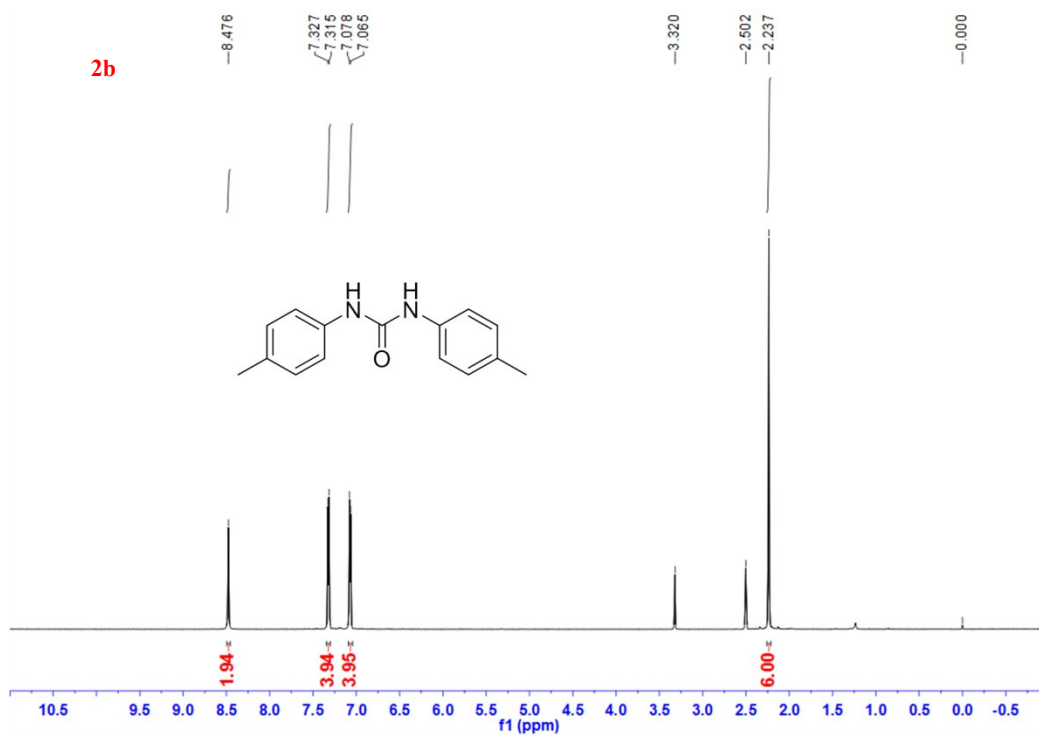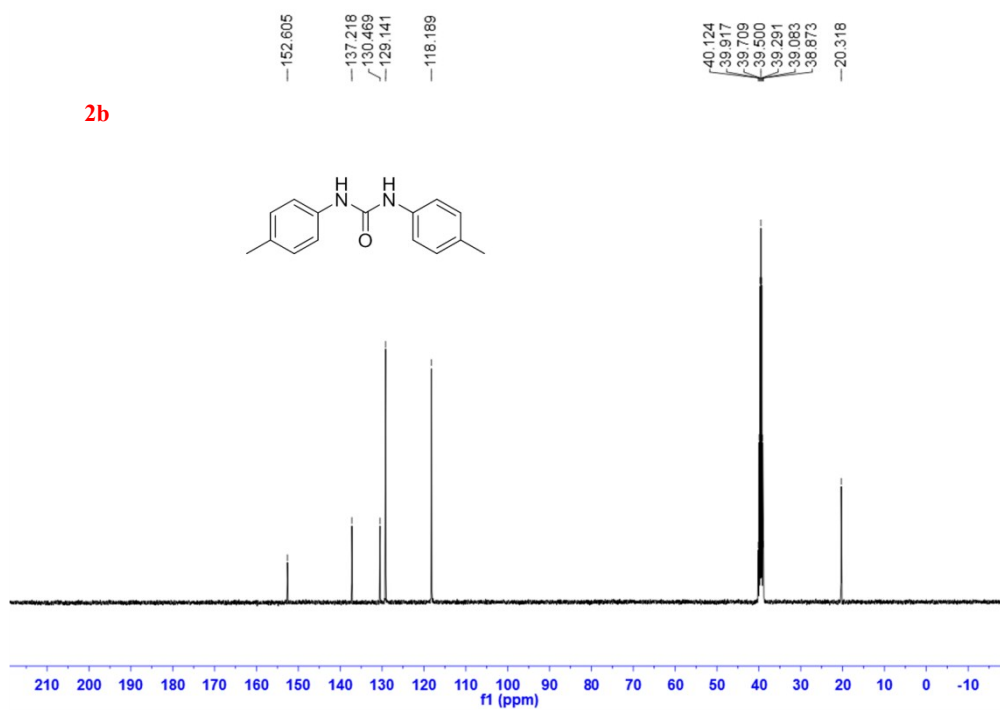

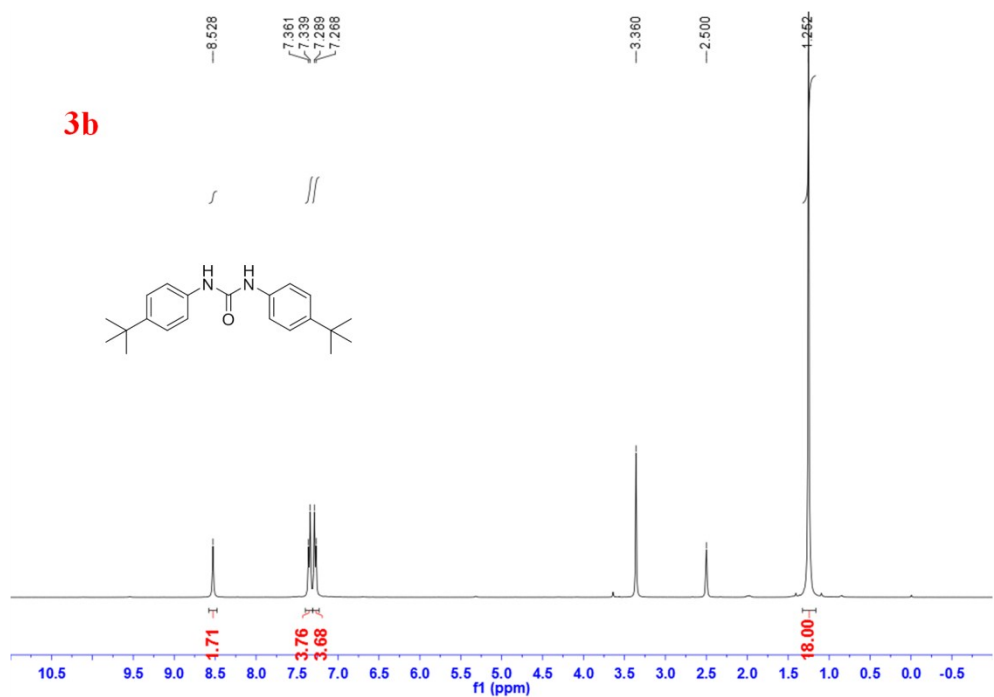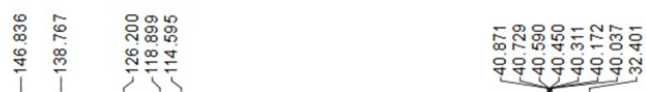

**3b**

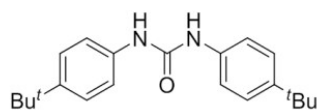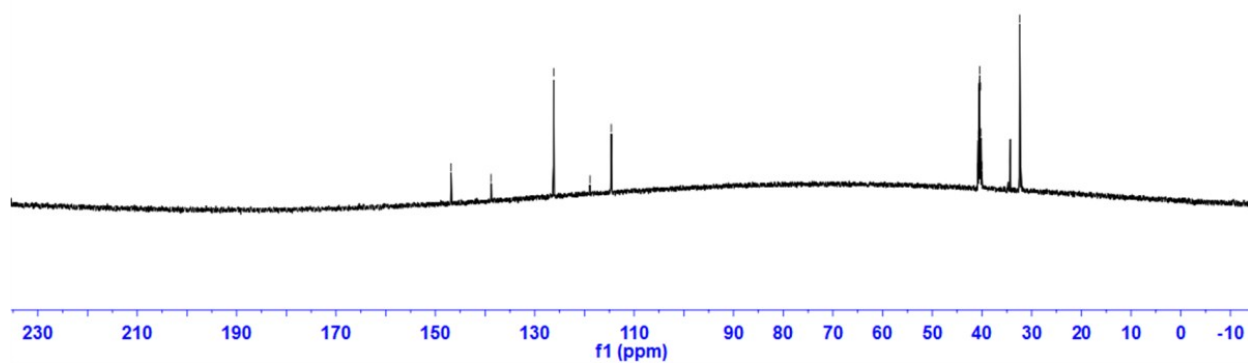

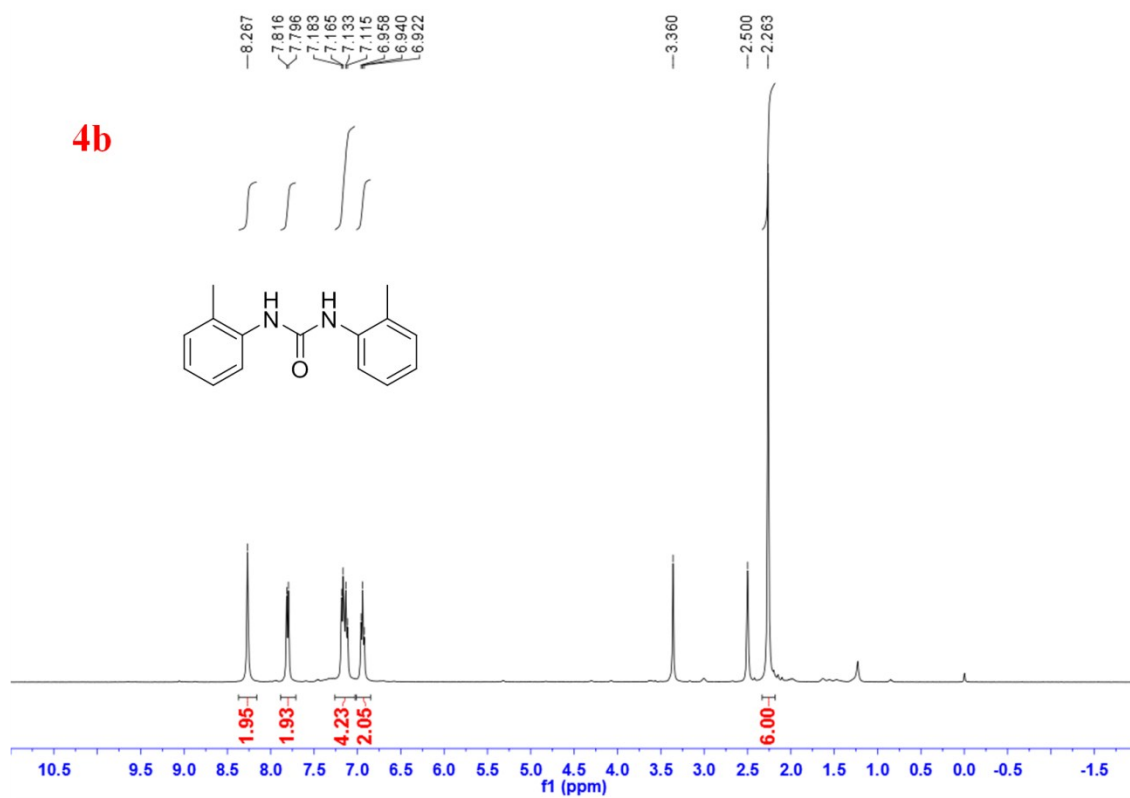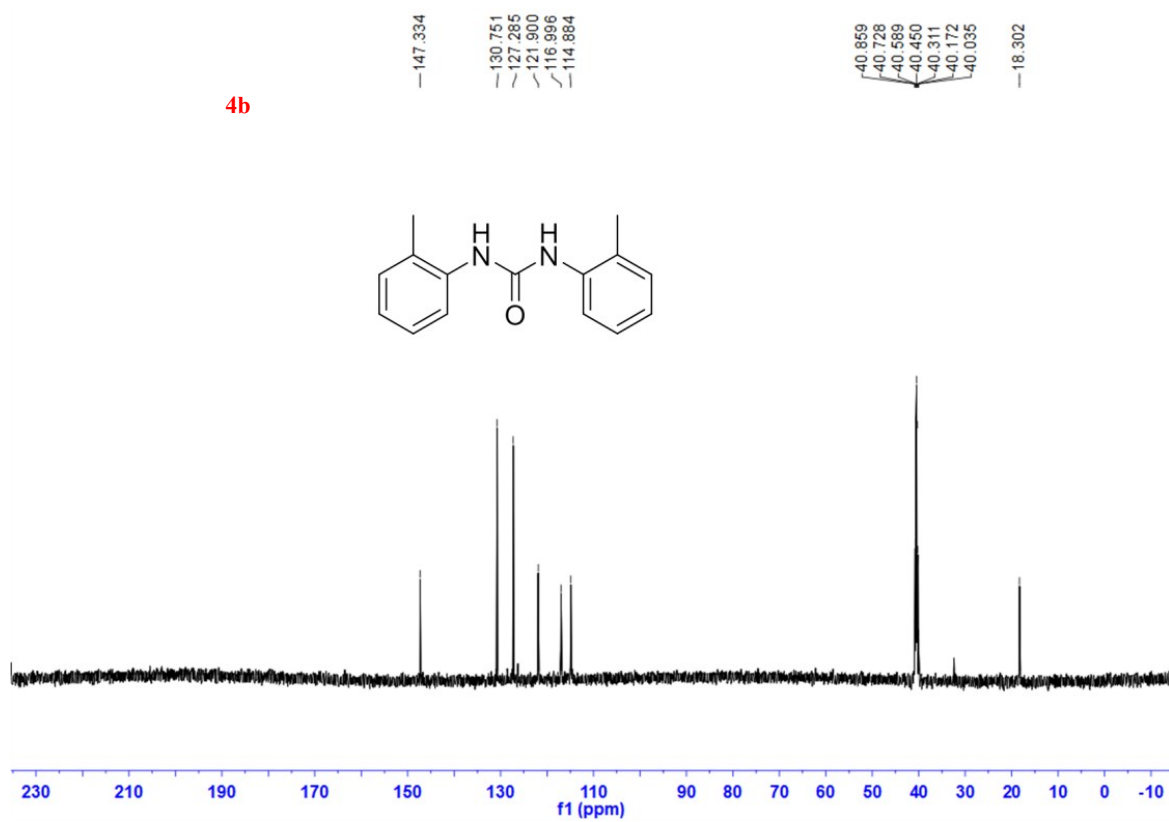

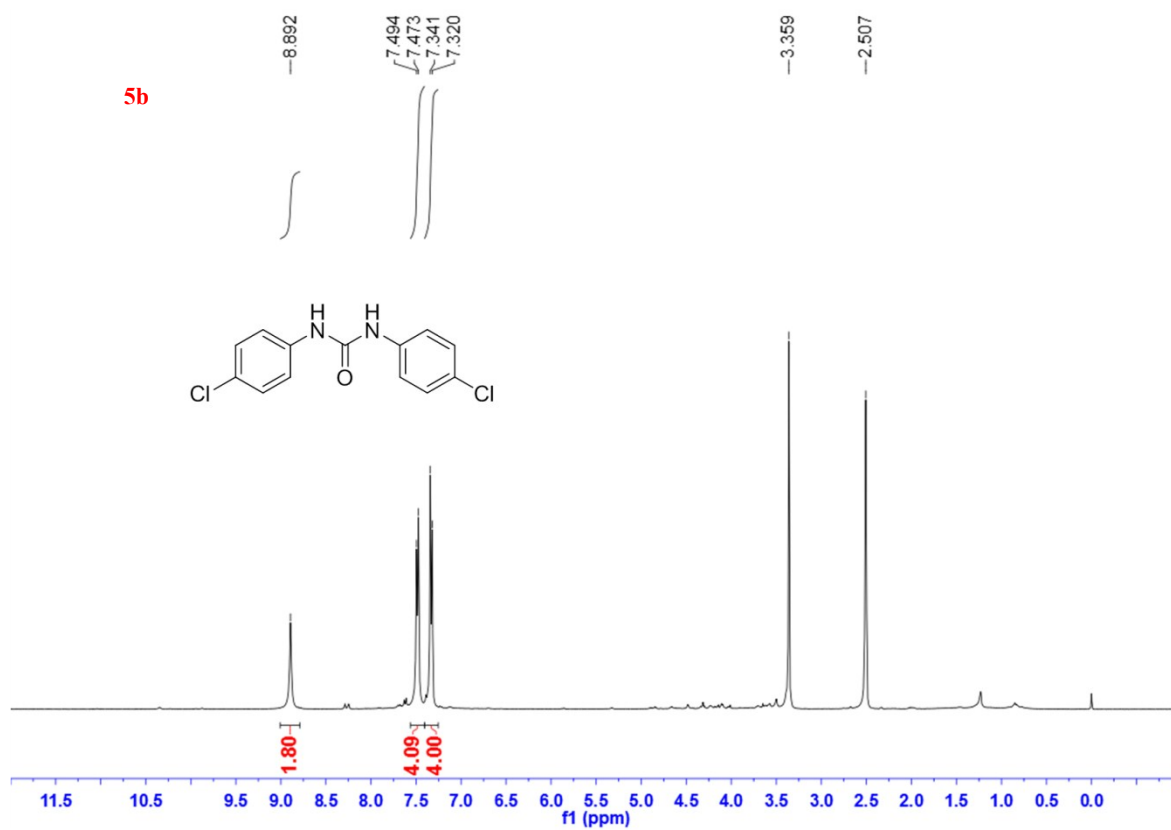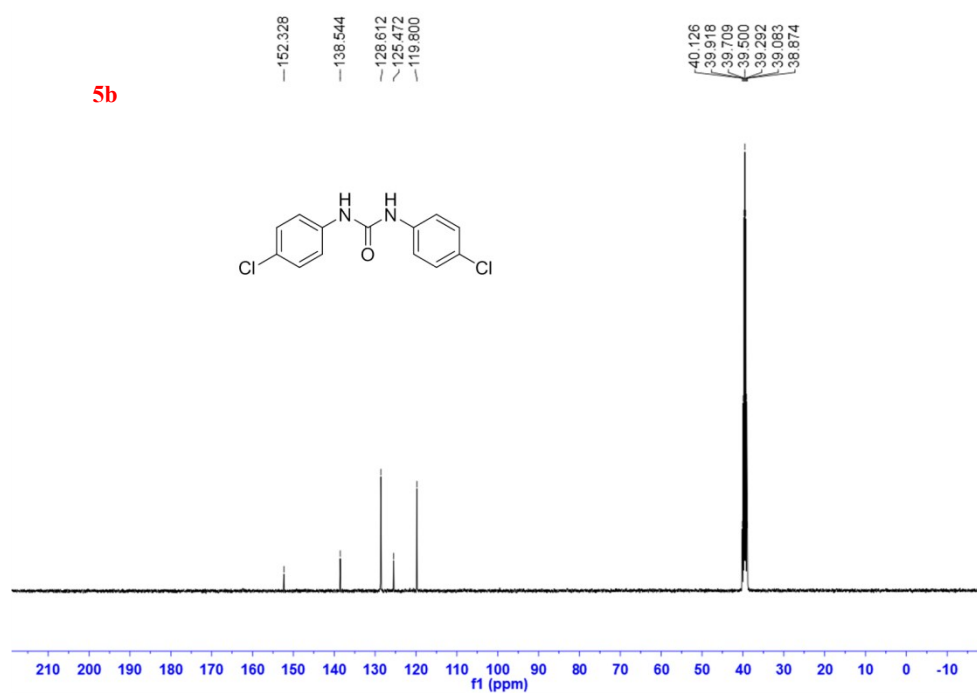

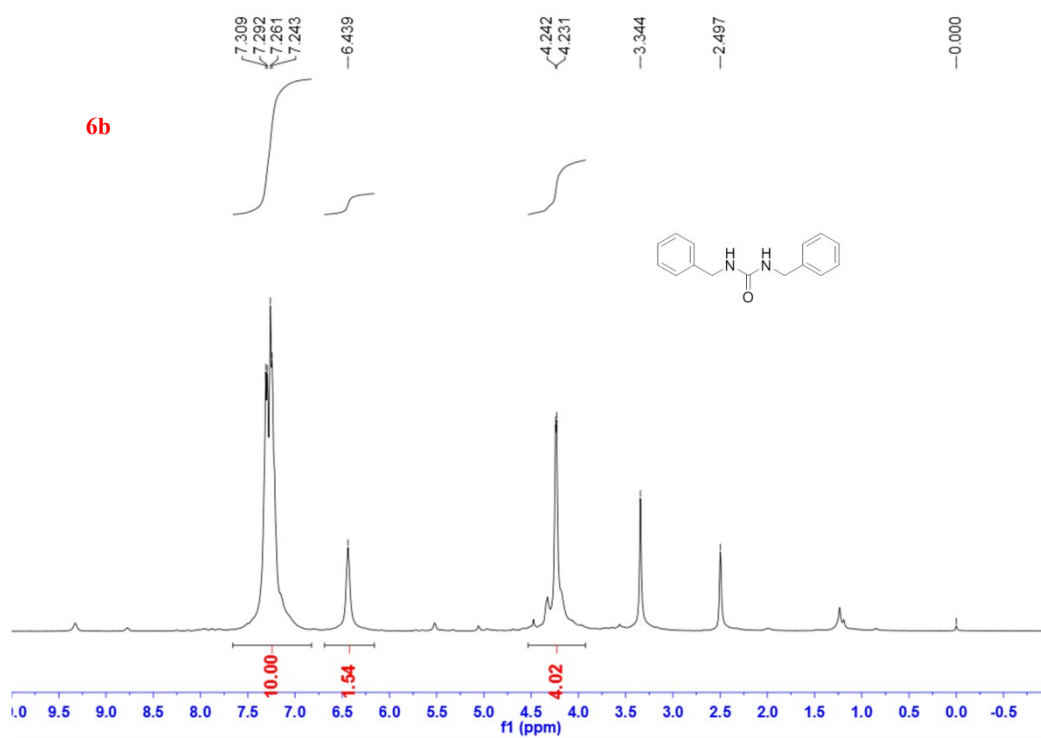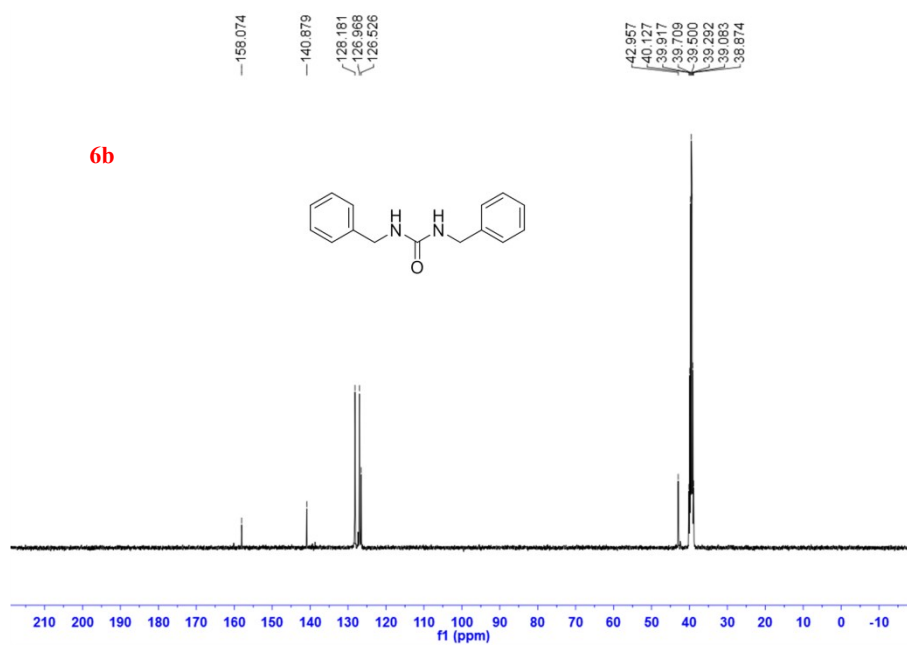

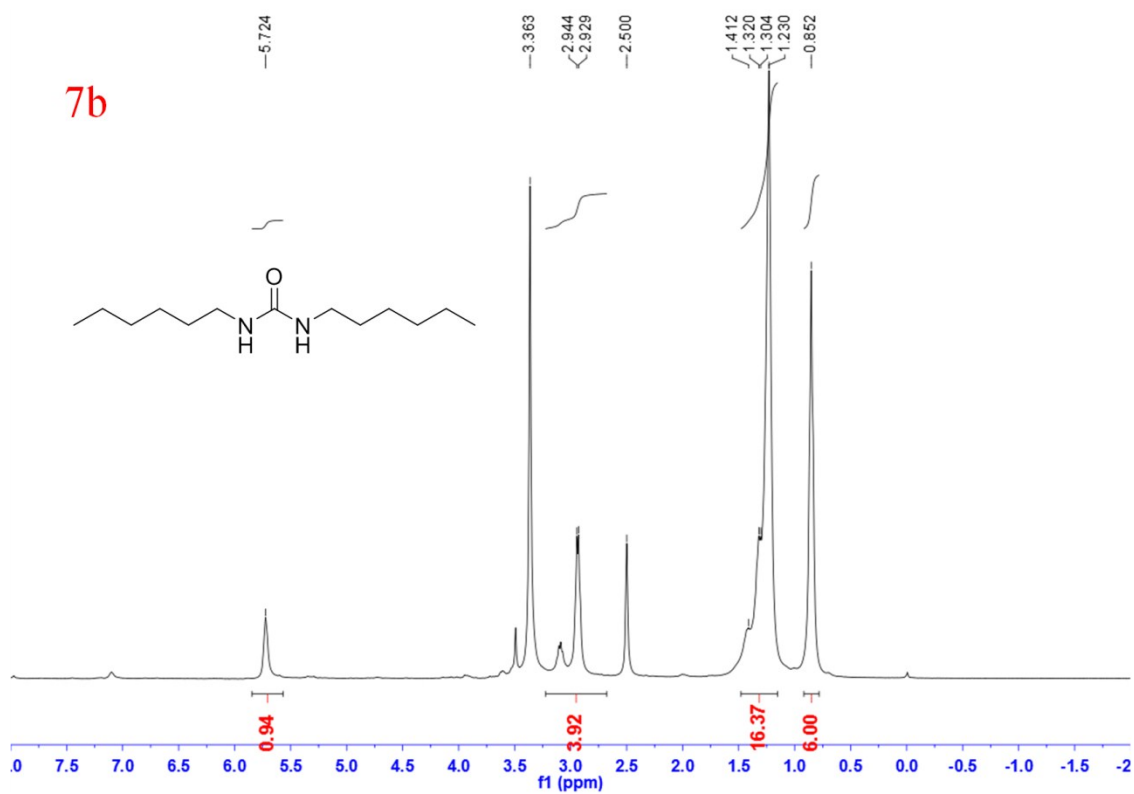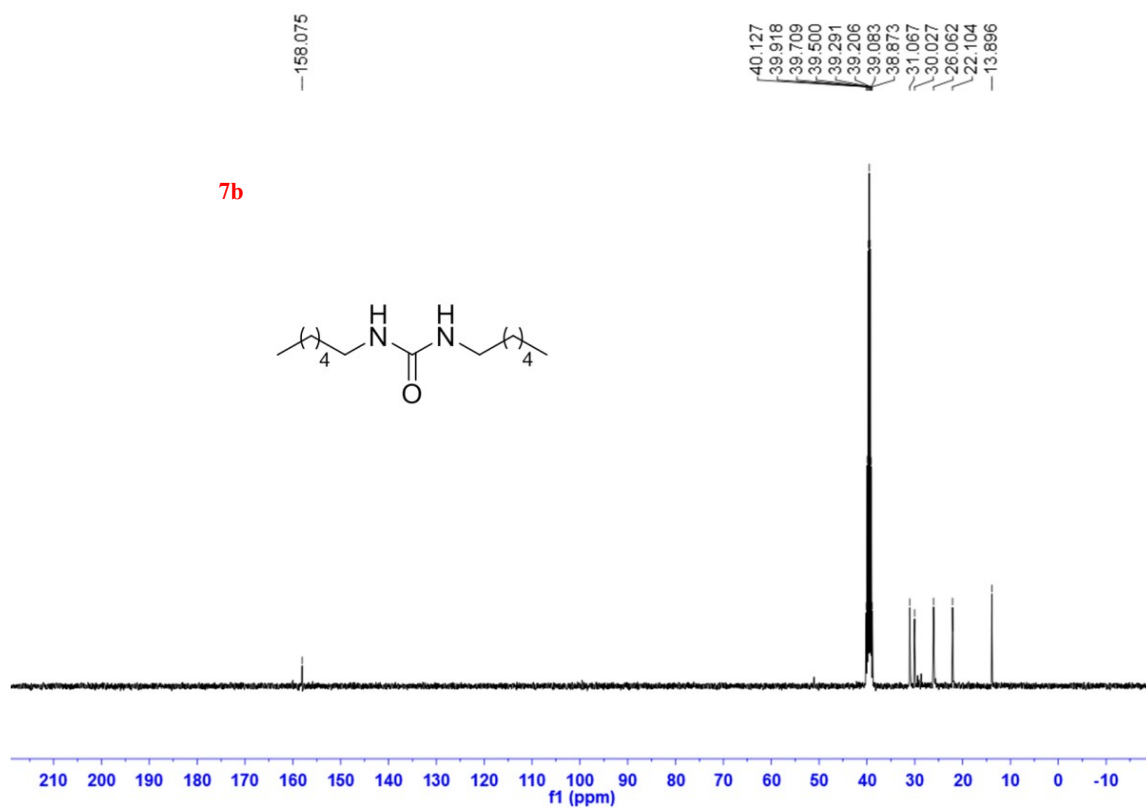

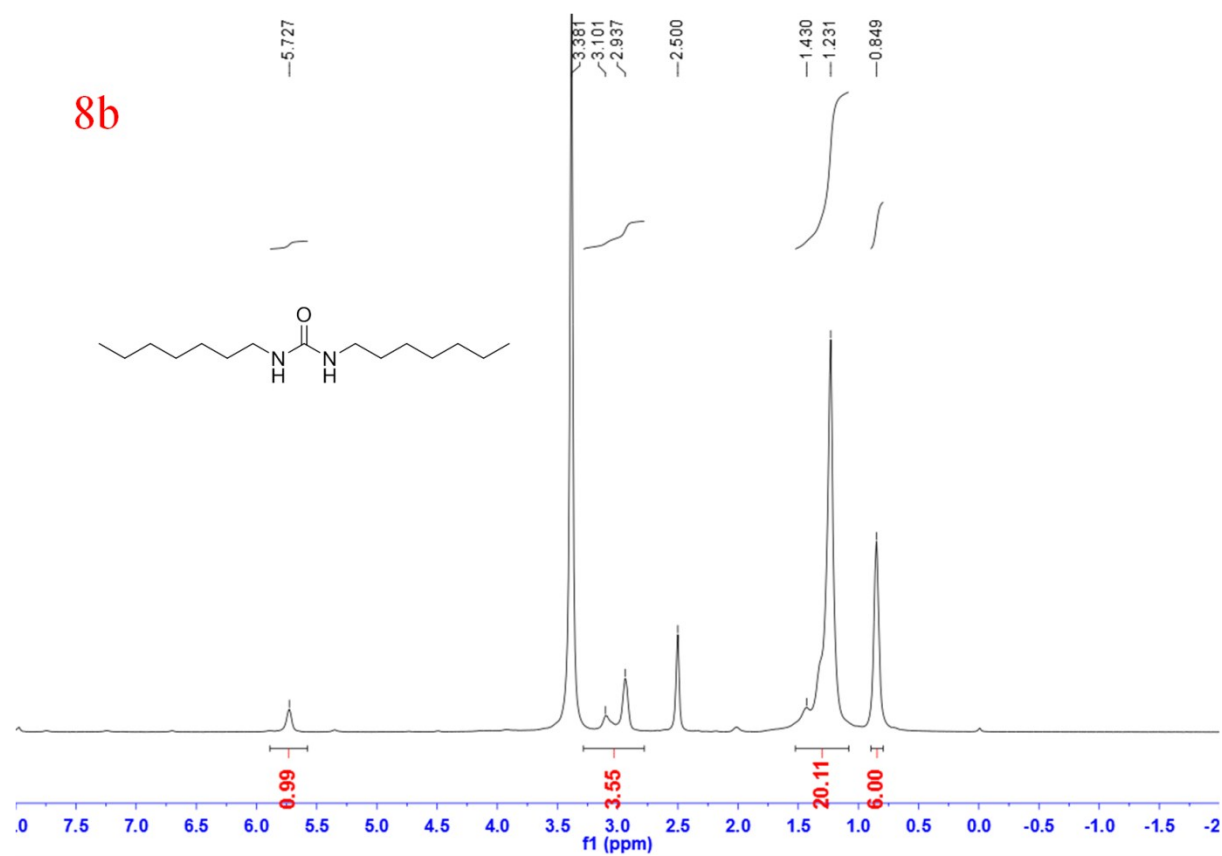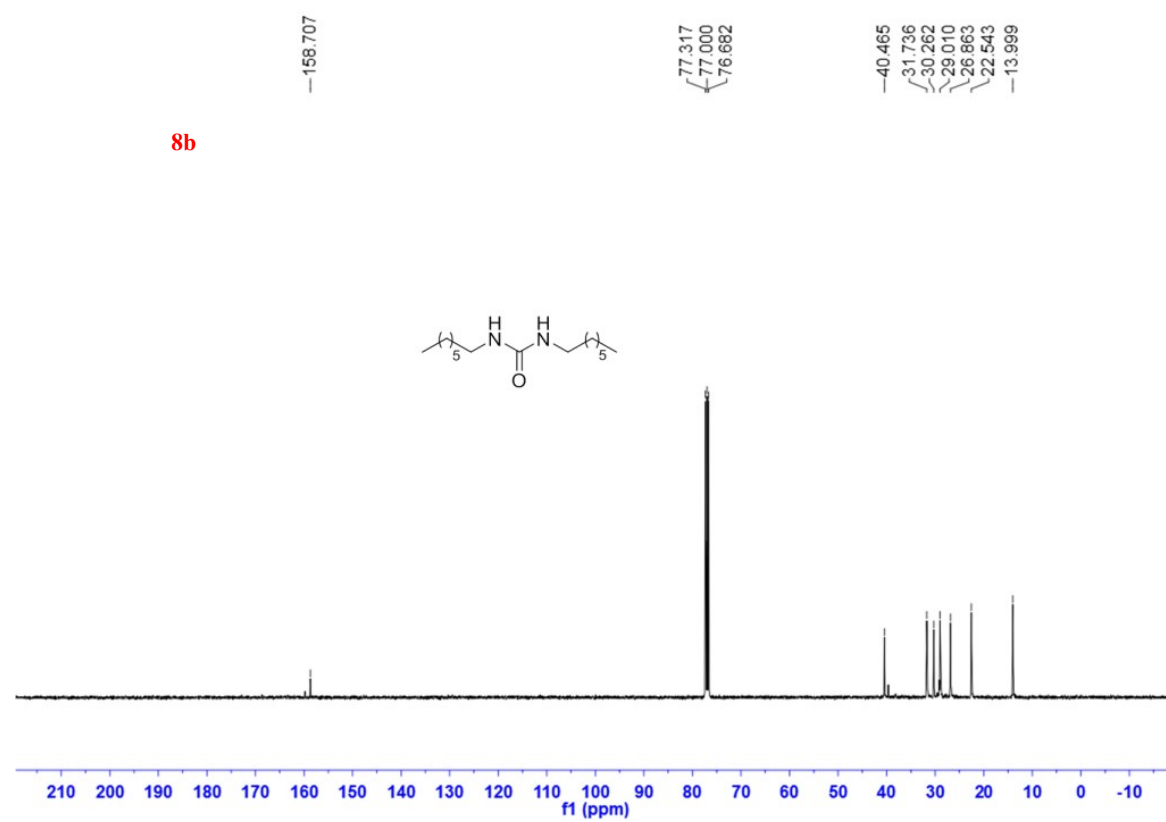



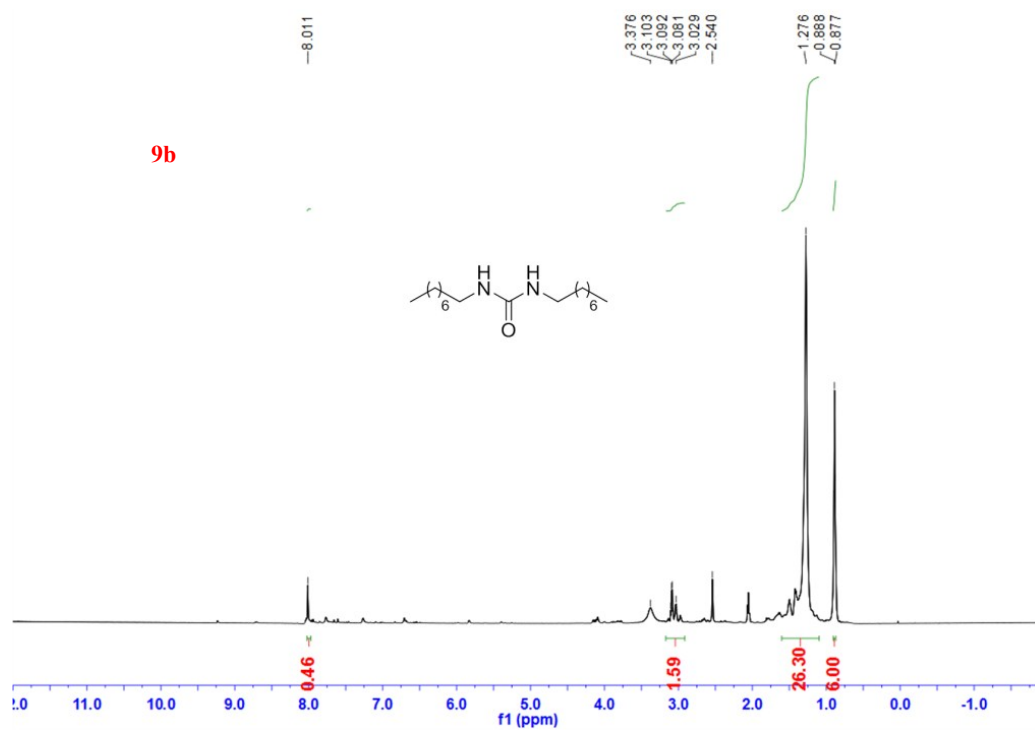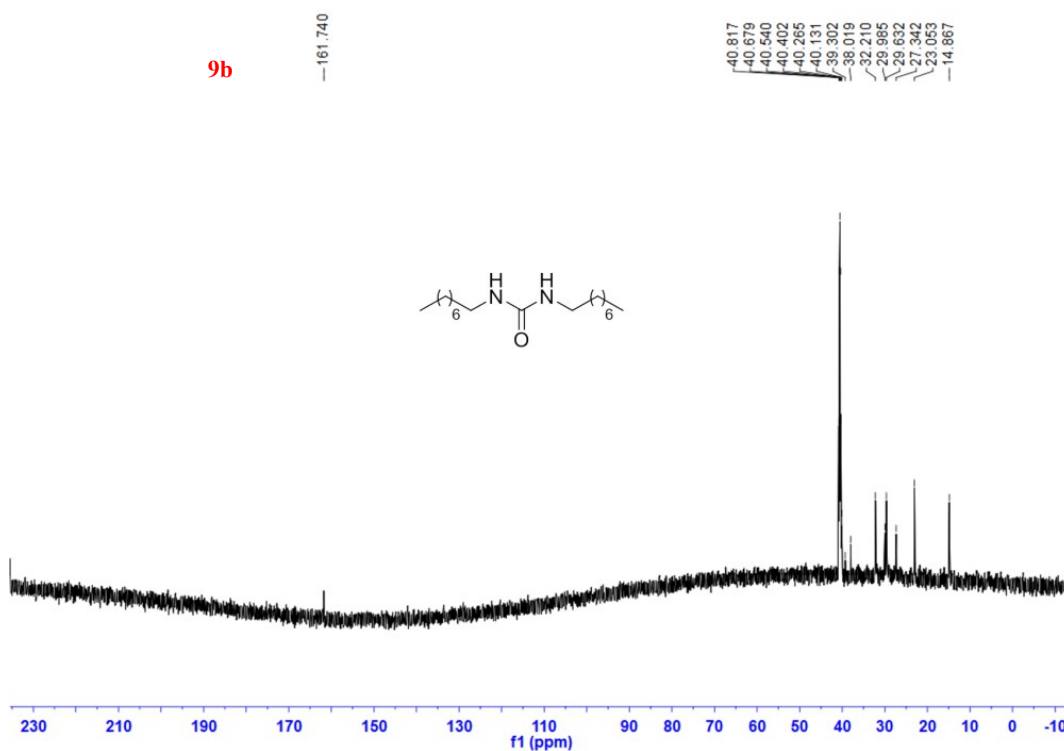

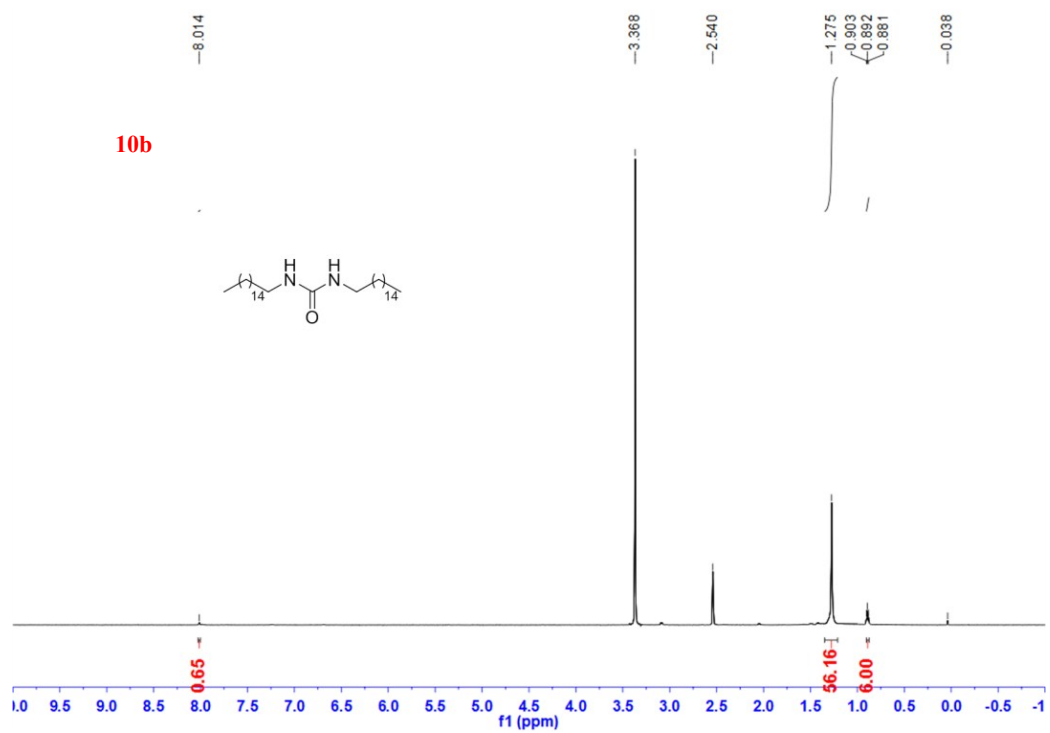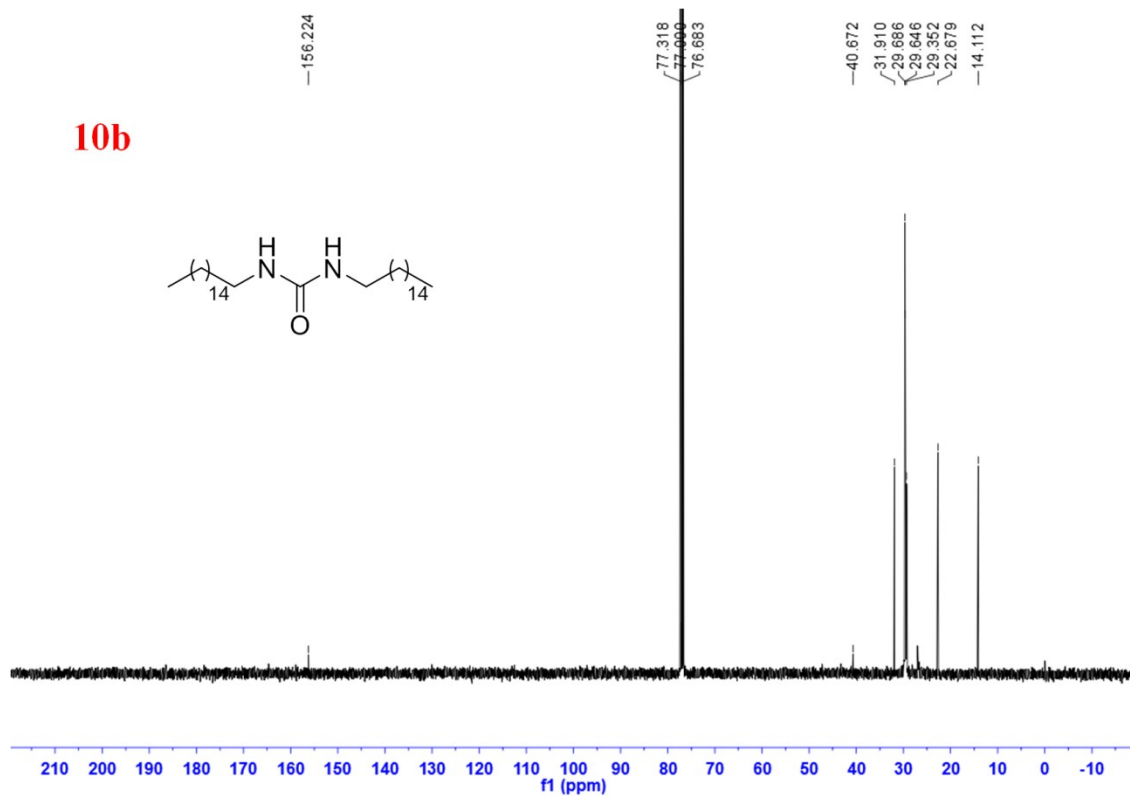

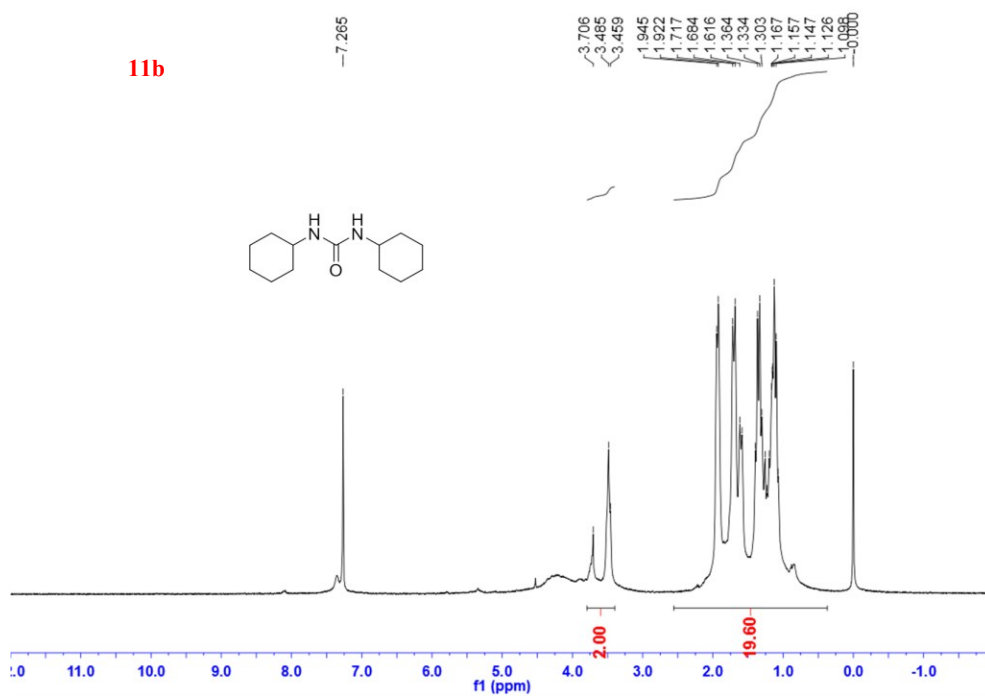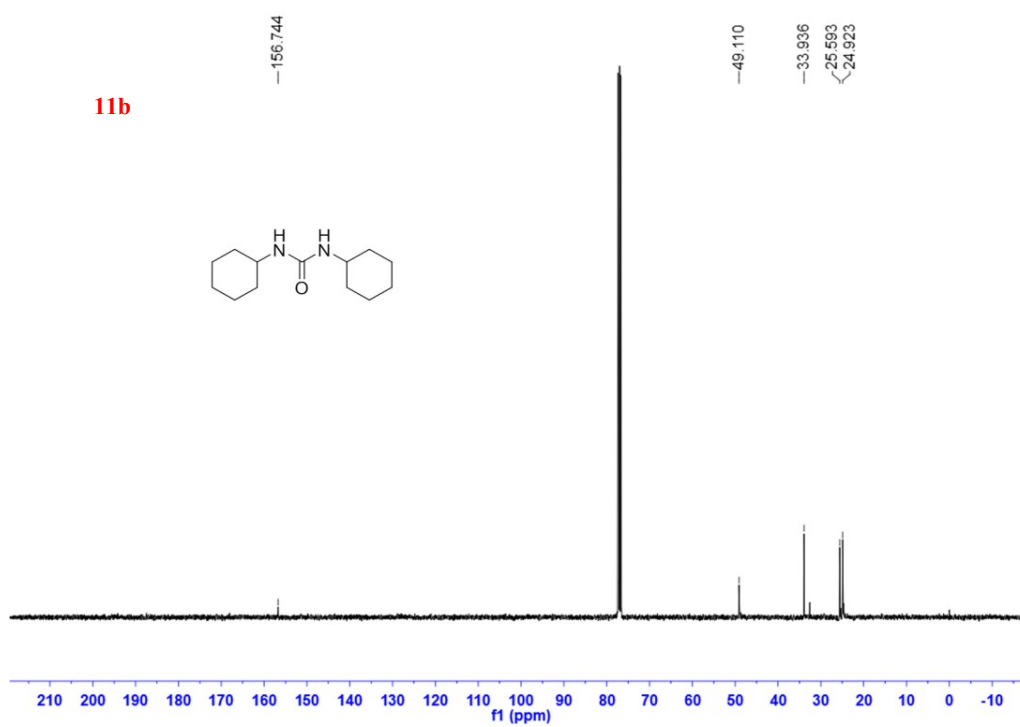

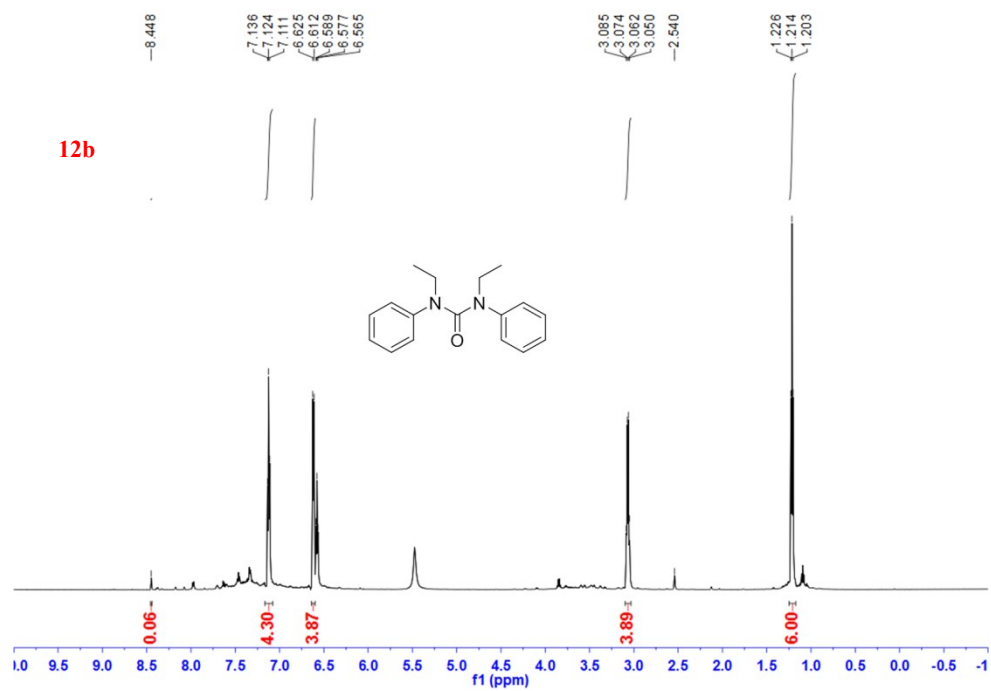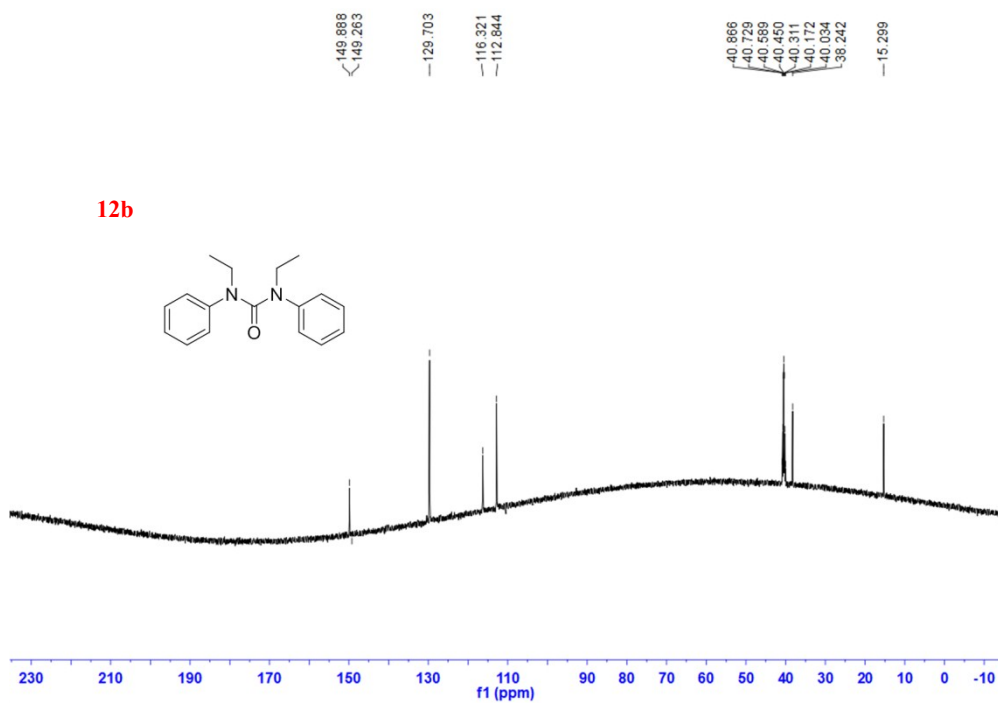

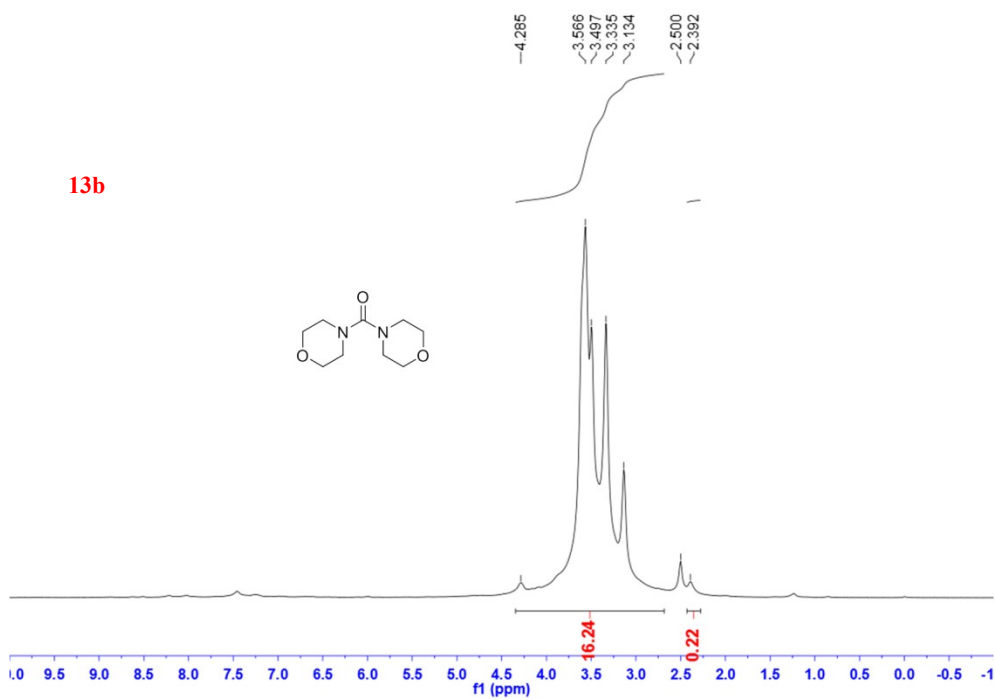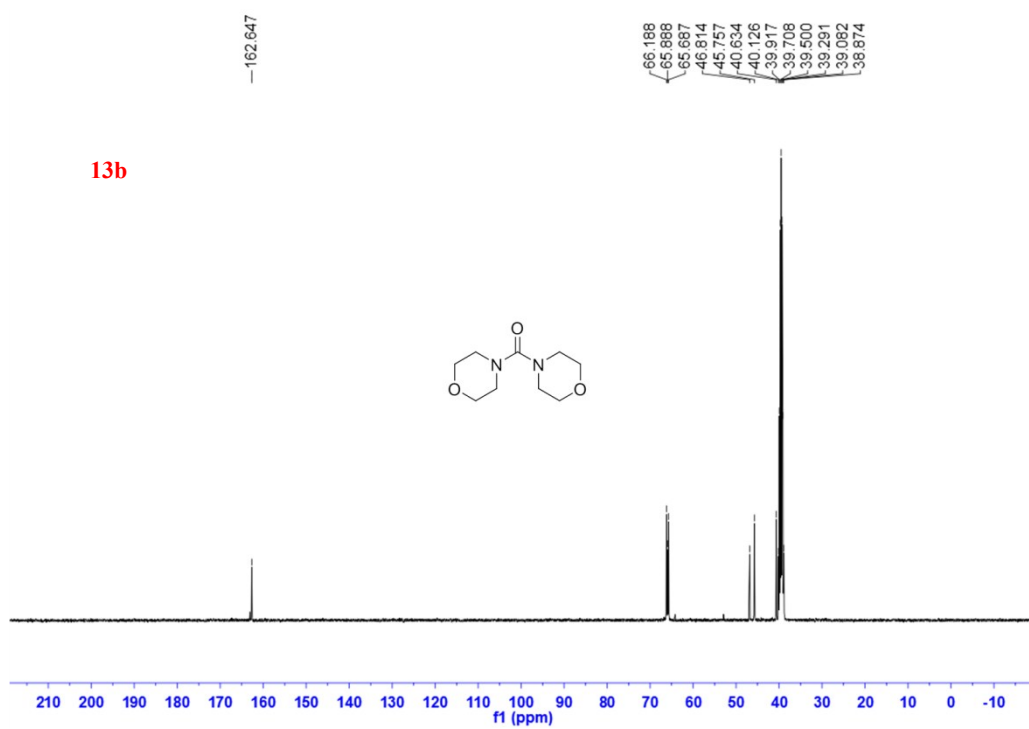

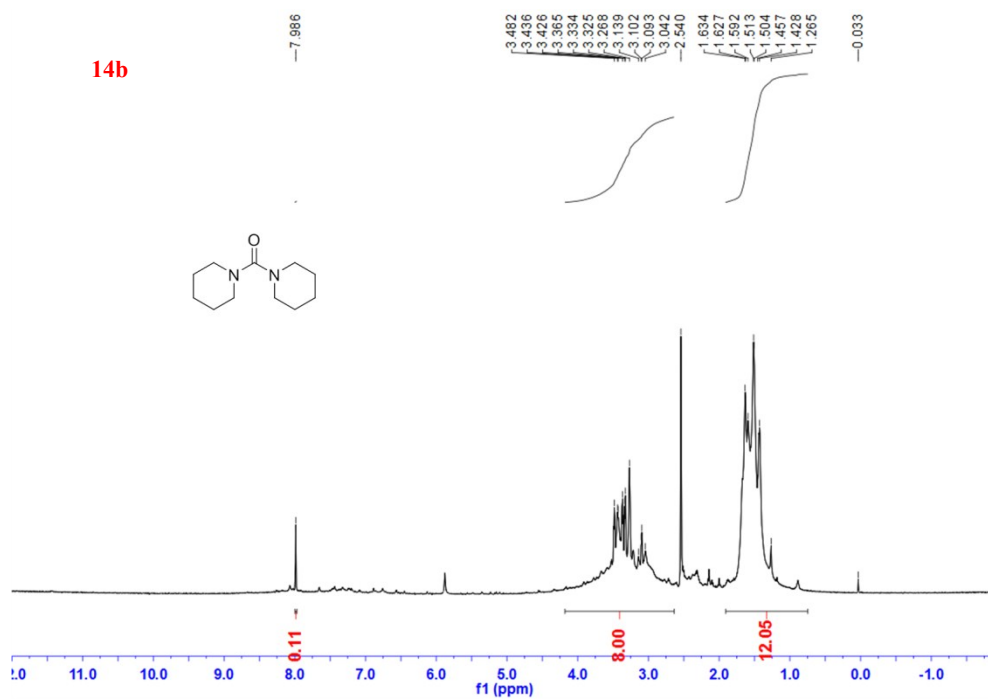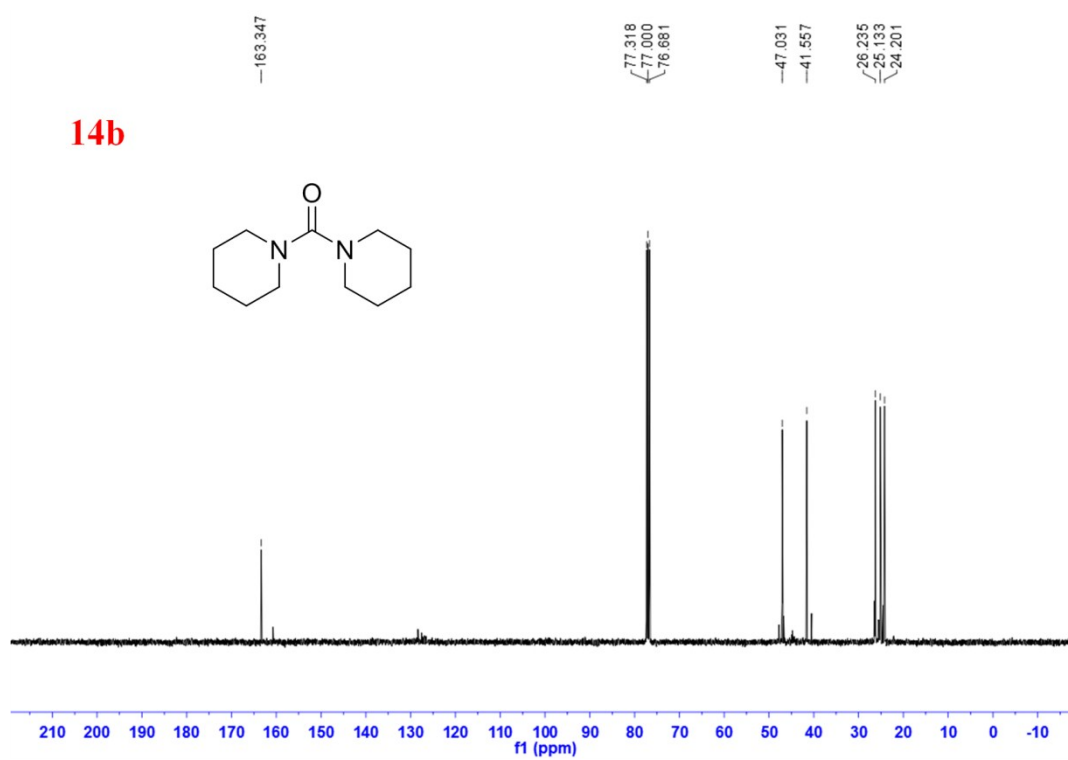

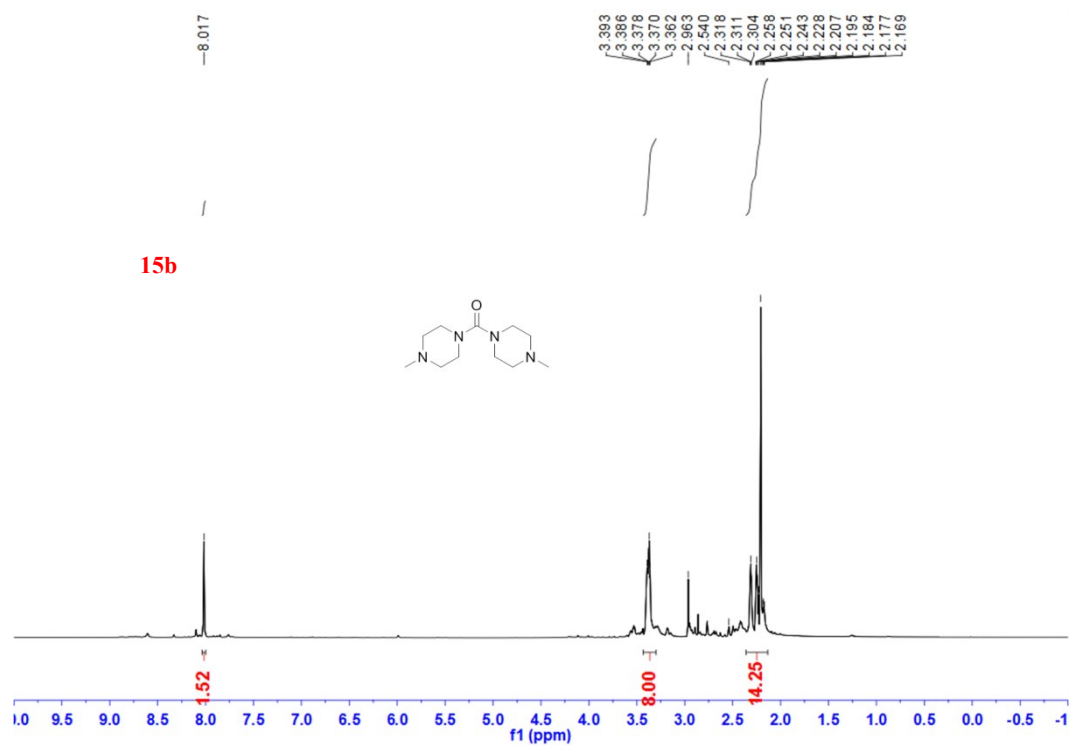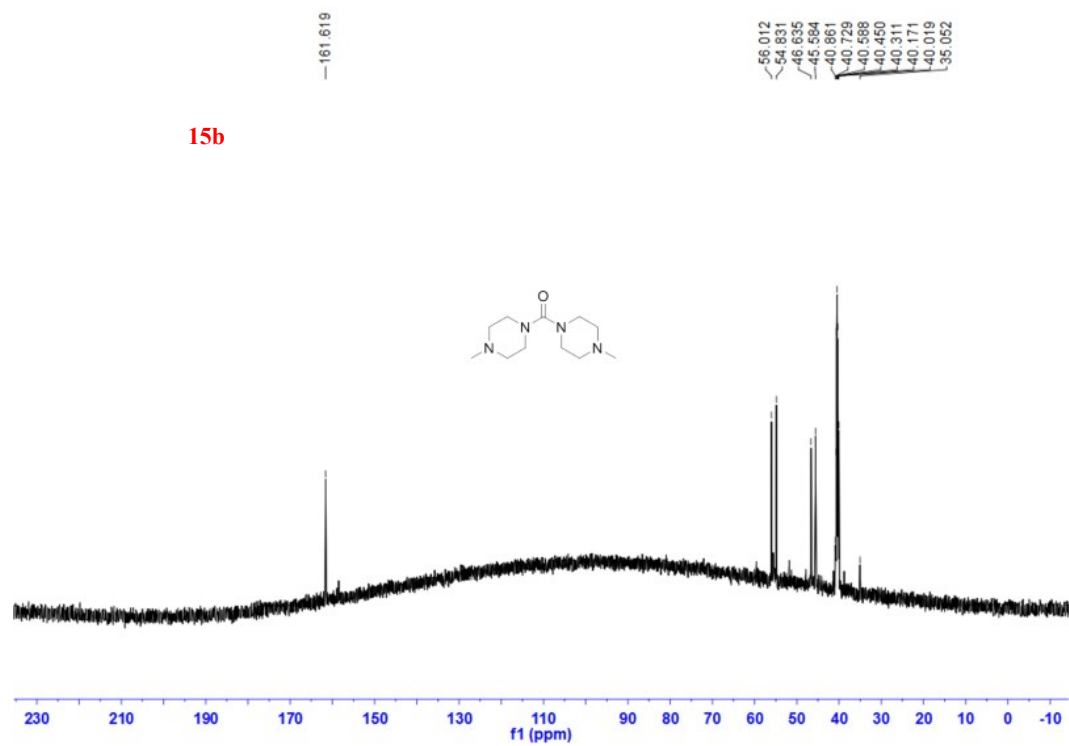

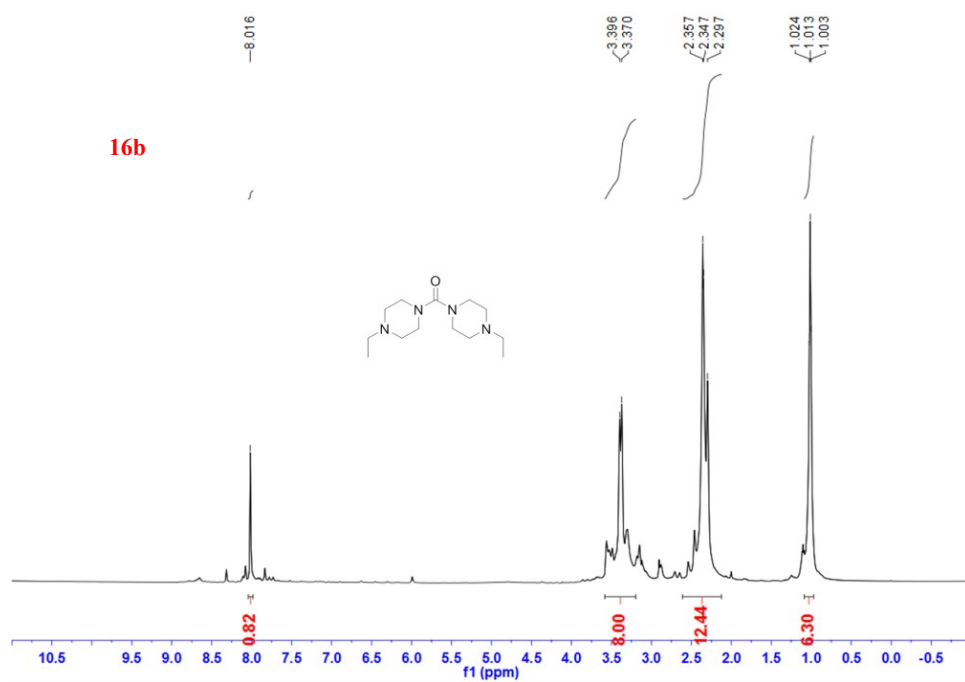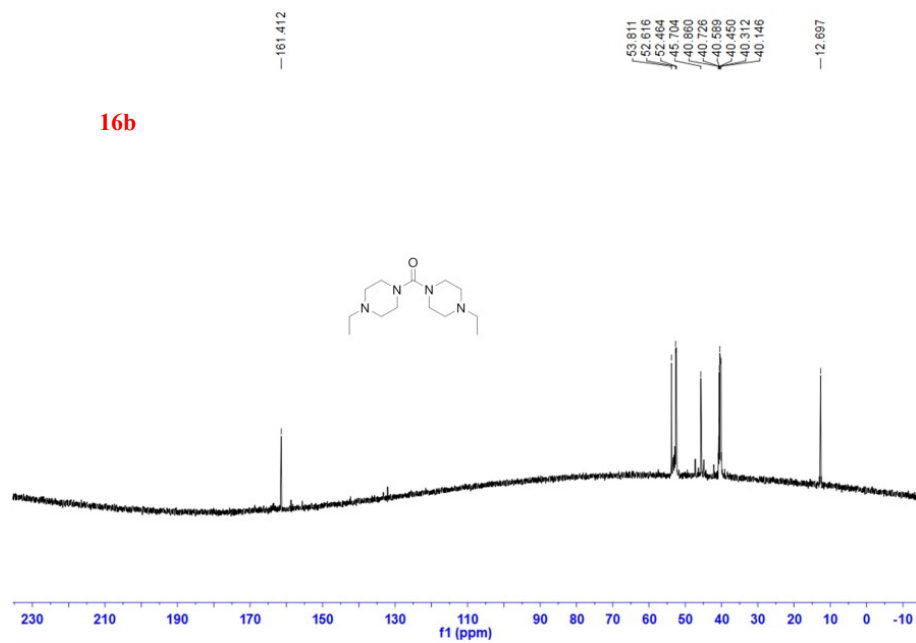



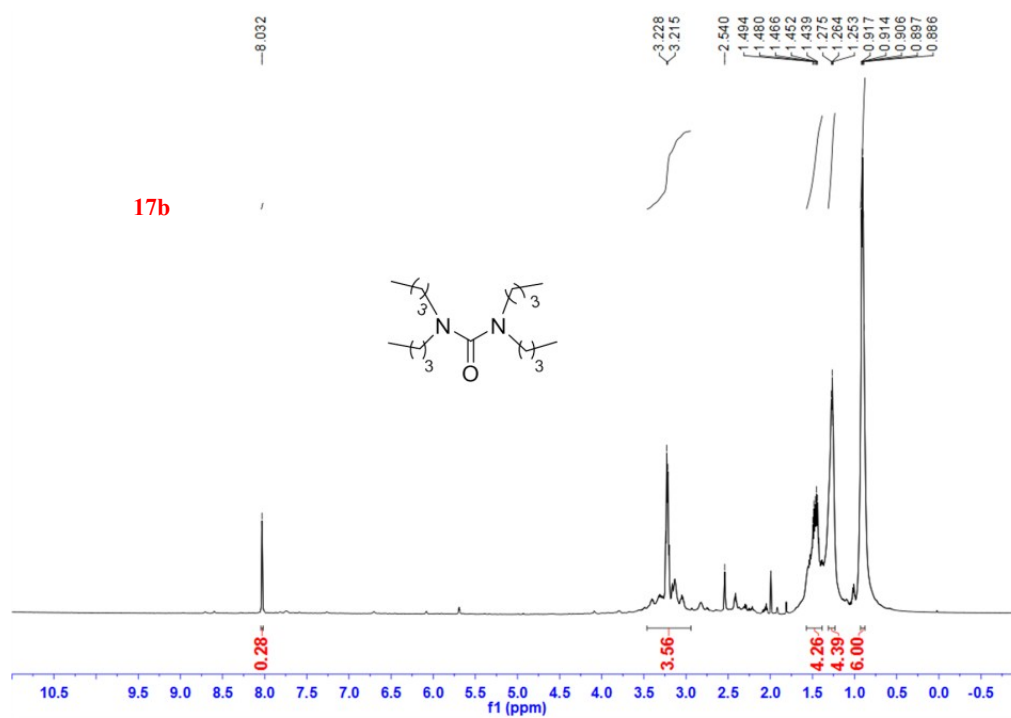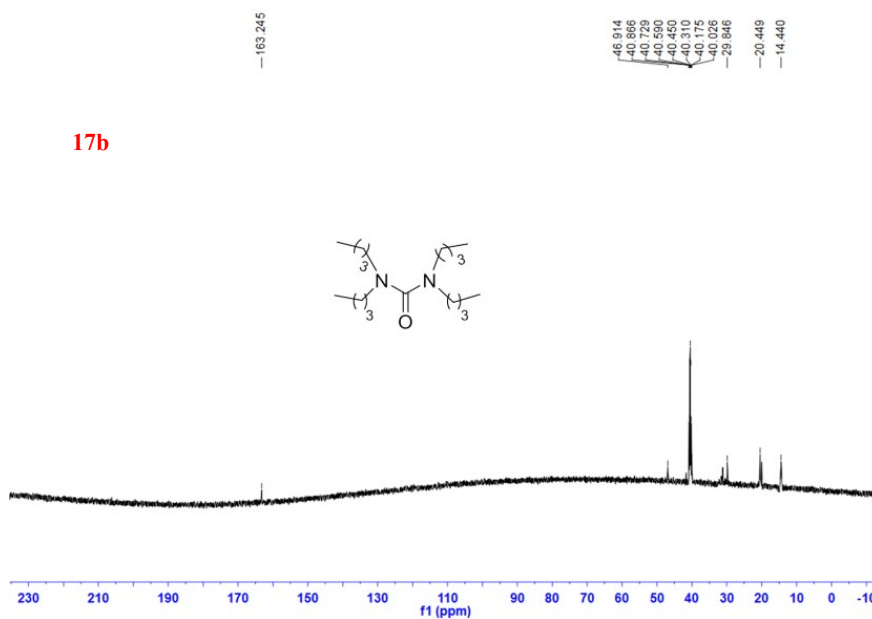

## 5. References

1. S. Liu, H. Wang, X. Dai, F. Shi, *Green Chem.*, 2018, **20**, 3457.
2. J. H. Park, J. C. Yoon, Y. K. Chung, *Adv. Synth. Catal.*, 2009, **351**, 1233.
3. M. Wang, J. Han, X. Si, Y. Hu, et al., *Tetrahedron Lett.*, 2018, **59**, 1614.
4. V. Krishnakumar, B. Chatterjee, C. Gunanathan, *Inorg. Chem.*, 2017, **56**, 7278.
5. T. Mizuno, T. Nakai, M. Mihara, *Synthesis*, 2010, **2010**, 4251.
6. A. Gee, A. Dheere, S. Bongarzone, C. Taddei, et al., *Synlett*, 2015, **26**, 2257.
7. Z.-Z. Yang, L.-N. He, Y.-N. Zhao, B. Li, et al., *Energ. Environ. Sci.*, 2011, **4**, 3971.
